# Supplementary material for: Lmo4 synergizes with Fezf2 to promote direct in vivo reprogramming of upper layer cortical neurons and cortical glia towards deep-layer neuron identities
Source: PLoS Biol. 2023 Aug 8;21(8):e3002237. doi: 10.1371/journal.pbio.3002237 (PMC10409279; doi:10.1371/journal.pbio.3002237)
Supplement: S2 Data — Highlighted in blue, comparisons that produced statistically significant P-values. (XLSX) [file pbio.3002237.s009.xlsx]

## Sheet: Fig. 2C raw data 
	Motor Area Expression of UL and DL markers
	cGFP					cLmo4					cFezf2					cFezf2 cLmo4
	n1	n2	n3	Mean	SEM	n1	n2	n3	Mean	SEM	n1	n2	n3	Mean	SEM	n1	n2	n3	Mean	SEM
CUX1	92.4	98.1	93	94.5	1.80831	93	85.4	95	91.1333	2.92423	22.3	11.3	16.5	16.7	3.177	5.9	1.9	0	2.6	1.73877
CTIP2	4.8	4.7	3.5	4.33333	0.417665	11	7.3	4.2	7.5	1.96554	35.1	45.6	34.2	38.3	3.65923	79	78	81.4	79.4667	1.00885
FOG2	13.6	2	7.6	7.73333	3.3493	7	13.5	8.2	9.56667	1.99694	36.8	30.3	27.3	31.4667	2.80377	21.9	22.5	25	23.1333	0.949269
PCP4	0	0	0	0	0	0	0	0	0	0	28	21.9	19.7	23.2	2.48261	45.2	50	42	45.7333	2.32475
DARPP32	0	1.2	3.5	1.56667	1.02686	14.5	25.4	6.9	15.6	5.36874	58.2	62.3	57.4	59.3	1.51767	66.9	59.7	59	61.8667	2.52477

## Sheet: Fig. 2C statistics
Motor Area Expression of UL and DL markers		Two-way ANOVA, Tukey’s post-hoc correction, n=3 brains/plasmid combination
Hypothesis	Mean 1	Mean 2	Mean Diff.	95,00% CI of diff.	Summary	P Value
Cux1
cGFP vs. cL		91.13	3.367	-6.986 to 13.72	ns	0.8064
cGFP vs. cF	94.5	16.7	77.8	67.45 to 88.15	****	<0.0001
cGFP vs. cFL	94.5	2.6	91.9	81.55 to 102.3	****	<0.0001
cL vs. cF	91.13	16.7	74.43	64.08 to 84.79	****	<0.0001
cL vs. cFL	91.13	2.6	88.53	78.18 to 98.89	****	<0.0001
cF vs. cFL	16.7	2.6	14.1	3.747 to 24.45	**	0.005
Ctip2
cGFP vs. cL	4.333	7.5	-3.167	-13.52 to 7.186	ns	0.8331
cGFP vs. cF	4.333	38.3	-33.97	-44.32 to -23.61	****	<0.0001
cGFP vs. cFL	4.333	79.47	-75.13	-85.49 to -64.78	****	<0.0001
cL vs. cF	7.5	38.3	-30.8	-41.15 to -20.45	****	<0.0001
cL vs. cFL	7.5	79.47	-71.97	-82.32 to -61.61	****	<0.0001
cF vs. cFL	38.3	79.47	-41.17	-51.52 to -30.81	****	<0.0001
Fog2
cGFP vs. cL	7.733	9.567	-1.833	-12.19 to 8.52	ns	0.9609
cGFP vs. cF	7.733	31.47	-23.73	-34.09 to -13.38	****	<0.0001
cGFP vs. cFL	7.733	23.13	-15.4	-25.75 to -5.047	**	0.0021
cL vs. cF	9.567	31.47	-21.9	-32.25 to -11.55	****	<0.0001
cL vs. cFL	9.567	23.13	-13.57	-23.92 to -3.214	**	0.0071
cF vs. cFL	31.47	23.13	8.333	-2.02 to 18.69	ns	0.1463
Pcp4
cGFP vs. cL	0	0	0	-10.35 to 10.35	ns	>0.9999
cGFP vs. cF	0	23.2	-23.2	-33.55 to -12.85	****	<0.0001
cGFP vs. cFL	0	45.73	-45.73	-56.09 to -35.38	****	<0.0001
cL vs. cF	0	23.2	-23.2	-33.55 to -12.85	****	<0.0001
cL vs. cFL	0	45.73	-45.73	-56.09 to -35.38	****	<0.0001
cF vs. cFL	23.2	45.73	-22.53	-32.89 to -12.18	****	<0.0001
Darpp32
cGFP vs. cL	1.567	15.6	-14.03	-24.39 to -3.68	**	0.0052
cGFP vs. cF	1.567	59.3	-57.73	-68.09 to -47.38	****	<0.0001
cGFP vs. cFL	1.567	61.87	-60.3	-70.65 to -49.95	****	<0.0001
cL vs. cF	15.6	59.3	-43.7	-54.05 to -33.35	****	<0.0001
cL vs. cFL	15.6	61.87	-46.27	-56.62 to -35.91	****	<0.0001
cF vs. cFL	59.3	61.87	-2.567	-12.92 to 7.786	ns	0.9022

## Sheet: Fig. 2D raw data
	Ctip2 expression - S1 vs M1
	S1					M1
	n1	n2	n3	Mean	SEM	n1	n2	n3	Mean	SEM
cGFP	0	1.58	0	0.526667	0.526667	4.8	4.7	3.5	4.33333	0.417665
cLmo4	2.9	1.3	4.2	2.8	0.83865	11	7.3	4.2	7.5	1.96554
cFezf2	35.3	33	39.6	35.9667	1.9342	35.1	45.6	34.2	38.3	3.65923
cFezf2 & cLmo4	65.7	67	59.6	64.1	2.28108	79	78	81.4	79.4667	1.00885

## Sheet: Fig. 2D statistics
Ctip2 expression - S1 vs M1		Two-way ANOVA, Sidak’s post-hoc correction, n=3 brains/plasmid combination
Hypothesis	Mean 1	Mean 2	Mean Diff.	95,00% CI of diff.	Summary	P Value
cGFP S1 vs. M1	0.5267	4.333	-3.807	-11.27 to 3.66	ns	0.5303
cL S1 vs. M1	2.8	7.5	-4.7	-12.17 to 2.767	ns	0.3342
cF S1 vs. M1	35.97	38.3	-2.333	-9.8 to 5.134	ns	0.8651
cFL S1 vs. M1	64.1	79.47	-15.37	-22.83 to -7.9	***	0.0001

## Sheet: Fig. 2E raw data
	Fog2 expression - S1 vs M1
	S1					M1
	n1	n2	n3	Mean	SEM	n1	n2	n3	Mean	SEM
cGFP	1.1	0	0	0.366667	0.366667	13.6	2	7.6	7.73333	3.3493
cLmo4	9.19	5	9.4	7.86333	1.43295	7	13.5	8.2	9.56667	1.99694
cFezf2	8.6	37.8	18.5	21.6333	8.57367	36.8	30.3	27.3	31.4667	2.80377
cFezf2 & cLmo4	25	29	35	29.6667	2.90593	21.9	22.5	25	23.1333	0.949269

## Sheet: Fig. 2E statistics
Fog2 expression - S1 vs M1		Two-way ANOVA, Sidak’s post-hoc correction, n=3 brains/plasmid combination
Hypothesis	Mean 1	Mean 2	Mean Diff.	95,00% CI of diff.	Summary	P Value
cGFP S1 vs. M1	0.3667	7.733	-7.367	-21.94 to 7.21	ns	0.5382
cL S1 vs. M1	7.863	9.567	-1.703	-16.28 to 12.87	ns	0.9959
cF S1 vs. M1	21.63	31.47	-9.833	-24.41 to 4.743	ns	0.2736
cFL S1 vs. M1	29.67	23.13	6.533	-8.043 to 21.11	ns	0.6428
