# Supplementary material for: Lmo4 synergizes with Fezf2 to promote direct in vivo reprogramming of upper layer cortical neurons and cortical glia towards deep-layer neuron identities
Source: PLoS Biol. 2023 Aug 8;21(8):e3002237. doi: 10.1371/journal.pbio.3002237 (PMC10409279; doi:10.1371/journal.pbio.3002237)
Supplement: S5 Data — Highlighted in blue, comparisons that produced statistically significant P-values. (XLSX) [file pbio.3002237.s012.xlsx]

## Sheet: Fig. 6F raw data
	Neurog2-Bcl2 + Fezf2 (NBF), 12dpi
	RFP+Ctip2+/RFP+ All layers (%)	RFP+GFP+Ctip2+/RFP+GFP+ All layers (%)	RFP+Ctip2+/RFP+ UL (%)	RFP+GFP+Ctip2+/RFP+GFP+ UL (%)	RFP+Ctip2+/RFP+ DL (%)	RFP+GFP+Ctip2+/RFP+GFP+ DL (%)
n1	6.19469	20	3.52941	18.0328	14.2857	33.3333
n2	1.65746	16.6667	0.854701	14.2857	3.125	22.2222
n3	3.79747	18.75	1.66667	12.766	10.5263	35.2941
Mean	3.88321	18.4722	2.01693	15.0282	9.31234	30.2832
SD	2.26983	1.68394	1.37132	2.71077	5.67853	7.04954

## Sheet: Fig. 6F statistics
Somatosensory Area Expression of Ctip2 – Whole cortex, UL, DL		Welch-ANOVA test; n=3 brains, 676 cells analysed
Hypothesis	Mean 1	Mean 2	Mean Diff.	95,00% CI of diff.	Summary	P Value
RFP+ All vs RFP+GFP+ All	3.8832	18.4722	-14.589	-25.7382 to -3.4398	**	0.009
RFP+ All vs RFP+ Upper	3.8832	2.0169	1.86628	-9.2829 to 13.0155	ns	0.992
RFP+ All vs RFP+GFP+ Upper	3.8832	15.0282	-11.1449	-22.2941 to 0.0042	ns	0.05
RFP+ All vs RFP+ Deep	3.8832	9.3123	-5.42914	-16.5783 to 5.72	ns	0.593
RFP+ All vs RFP+GFP+ Deep	3.8832	30.2832	-26.4	-37.5492 to -15.2508	***	<0,001
RFP+GFP+ All vs RFP+ Upper	18.4722	2.0169	16.4553	5.3061 to 27.6045	**	0.003
RFP+GFP+ All vs RFP+GFP+ Upper	18.4722	15.0282	3.44407	-7.7051 to 14.5933	ns	0.896
RFP+GFP+ All vs RFP+ Deep	18.4722	9.3123	9.15988	-1.9893 to 20.3091	ns	0.133
RFP+GFP+ All vs RFP+GFP+ Deep	18.4722	30.2832	-11.811	-22.9602 to -0.6618	*	0.036
RFP+ Upper vs RFP+GFP+ Upper	2.0169	15.0282	-13.0112	-24.1604 to -1.862	*	0.019
RFP+ Upper vs RFP+ Deep	2.0169	9.3123	-7.29542	-18.4446 to 3.8538	ns	0.306
RFP+ Upper vs RFP+GFP+ Deep	2.0169	30.2832	-28.2663	-39.4155 to -17.1171	***	<0,001
RFP+GFP+ Upper vs RFP+ Deep	15.0282	9.3123	5.71581	-5.4334 to 16.865	ns	0.544
RFP+GFP+ Upper vs RFP+GFP+ Deep	15.0282	30.2832	-15.2551	-26.4043 to -4.1059	**	0.006
RFP+ Lower vs RFP+GFP+ Deep	9.3123	30.2832	-20.9709	-32.1201 to -9.8217	***	<0,001

## Sheet: Fig. 6G raw data
DCX
	Neurog2-Bcl2 + Fezf2 (NBF), 12dpi			Neurog2-Bcl2 + Fezf2-Lmo4 (NBFL), 12dpi
	GFP+DCX+/GFP+ (%)	RFP+DCX+/RFP+ (%)	GFP+RFP+DCX+/GFP+RFP+ (%)	GFP+DCX+/GFP+ (%)	RFP+DCX+/RFP+ (%)	GFP+RFP+DCX+/GFP+RFP+ (%)
n1	8.84956	62.7737	87.3171	12.5	71.8391	93.3333
n2	6.38298	78.6047	78.2609	20	77.7143	93.9394
n3	5.20833	59.7458	84.2857	22.7723	71.4286	83.871
Mean	6.81362	67.0414	83.2879	18.4241	73.6606	90.3812
SD	1.85842	10.1279	4.60982	5.31437	3.51655	5.64619
NeuN
	Neurog2-Bcl2 + Fezf2 (NBF), 12dpi			Neurog2-Bcl2 + Fezf2-Lmo4 (NBFL), 12dpi
	GFP+NeuN+/GFP+ (%)	RFP+NeuN+/RFP+ (%)	GFP+RFP+NeuN+/GFP+RFP+ (%)	GFP+NeuN+/GFP+ (%)	RFP+NeuN+/RFP+ (%)	GFP+RFP+NeuN+/GFP+RFP+ (%)
n1	2.94118	75.7282	78.4314	6.06061	80.5714	69.8795
n2	6.52174	75.9036	77.6316	8.82353	85.2878	83.0579
n3	11.7647	76.8546	82.8571	11.8644	70.4142	72.4138
Mean	7.07587	76.1621	79.64	8.91618	78.7578	75.1171
SD	4.43779	0.606085	2.81465	2.90301	7.60087	6.9927

## Sheet: Fig. 6G staitistics 
Expression of DCX – NBF vs NBFL		One-Way ANOVA, Tukey’s post-hoc correction; n=3 brains/retrovirus combination, 2827 cells analysed
Hypothesis	Mean 1	Mean 2	Mean Diff.	95,00% CI of diff.	Summary	P Value
NBF GFP+ vs NBFL GFP+	6.8136	18.4241	-11.6105	-27.4325 to 4.2115	ns	0.209
NBF GFP+ vs NBF RFP+	6.8136	67.04	-60.2264	-76.0484 to -44.4044	***	<0,001
NBF GFP+ vs NBFL RFP+	6.8136	73.66	-66.8464	-82.6684 to -51.0244	***	<0,001
NBF GFP+ vs NBF RFP+GFP+	6.8136	83.29	-76.4764	-92.2984 to -60.6544	***	<0,001
NBF GFP+ vs NBFL RFP+GFP+	6.8136	90.38	-83.5664	-99.3884 to -67.7444	***	<0,001
NBFL GFP+ vs NBF RFP+	18.4241	67.04	-48.6159	-64.4379 to -32.7939	***	<0,001
NBFL GFP+ vs NBFL RFP+	18.4241	73.66	-55.2359	-71.0579 to -39.4139	***	<0,001
NBFL GFP+ vs NBF RFP+GFP+	18.4241	83.29	-64.8659	-80.6879 to -49.0439	***	<0,001
NBFL GFP+ vs NBFL RFP+GFP+	18.4241	90.38	-71.9559	-87.7779 to -56.1339	***	<0,001
NBF RFP+ vs NBFL RFP+	67.04	73.66	-6.62	-22.442 to 9.202	ns	0.724
NBF RFP+ vs NBF RFP+GFP+	67.04	83.29	-16.25	-32.072 to -0.428	*	0.043
NBF RFP+ vs NBFL RFP+GFP+	67.04	90.38	-23.34	-39.162 to -7.518	**	0.003
NBFL RFP+ vs NBF RFP+GFP+	73.66	83.29	-9.63	-25.452 to 6.192	ns	0.374
NBFL RFP+ vs NBFL RFP+GFP+	73.66	90.38	-16.72	-32.542 to -0.898	*	0.036
NBF RFP+GFP+ vs NBFL RFP+GFP+	83.29	90.38	-7.09	-22.912 to 8.732	ns	0.668
Expression of NeuN – NBF vs NBFL		One-Way ANOVA, Tukey’s post-hoc correction; n=3 brains/retrovirus combination, 1550 cells analysed
Hypothesis	Mean 1	Mean 2	Mean Diff.	95,00% CI of diff.	Summary	P Value
NBF GFP+ vs NBFL GFP+	7.0759	8.9162	-1.84031	-15.237 to 11.5563	ns	0.997
NBF GFP+ vs NBF RFP+	7.0759	76.16	-69.0841	-82.4808 to -55.6875	***	<0,001
NBF GFP+ vs NBFL RFP+	7.0759	78.7567	-71.6808	-85.0774 to -58.2841	***	<0,001
NBF GFP+ vs NBF RFP+GFP+	7.0759	79.64	-72.5641	-85.9608 to -59.1675	***	<0,001
NBF GFP+ vs NBFL RFP+GFP+	7.0759	75.1167	-68.0408	-81.4374 to -54.6441	***	<0,001
NBFL GFP+ vs NBF RFP+	8.9162	76.16	-67.2438	-80.6405 to -53.8472	***	<0,001
NBFL GFP+ vs NBFL RFP+	8.9162	78.7567	-69.8405	-83.2371 to -56.4438	***	<0,001
NBFL GFP+ vs NBF RFP+GFP+	8.9162	79.64	-70.7238	-84.1205 to -57.3272	***	<0,001
NBFL GFP+ vs NBFL RFP+GFP+	8.9162	75.1167	-66.2005	-79.5971 to -52.8038	***	<0,001
NBF RFP+ vs NBFL RFP+	76.16	78.7567	-2.59667	-15.9933 to 10.8	ns	0.984
NBF RFP+ vs NBF RFP+GFP+	76.16	79.64	-3.48	-16.8766 to 9.9166	ns	0.946
NBF RFP+ vs NBFL RFP+GFP+	76.16	75.1167	1.04333	-12.3533 to 14.44	ns	1
NBFL RFP+ vs NBF RFP+GFP+	78.7567	79.64	-0.88333	-14.28 to 12.5133	ns	1
NBFL RFP+ vs NBFL RFP+GFP+	78.7567	75.1167	3.64	-9.7566 to 17.0366	ns	0.936
NBF RFP+GFP+ vs NBFL RFP+GFP+	79.64	75.1167	4.52333	-8.8733 to 17.92	ns	0.858

## Sheet: Fig. 6H raw data
	Neurog2-Bcl2 + Fezf2 (NBF), 12dpi				Neurog2-Bcl2 + Fezf2-Lmo4 (NBFL), 12dpi
	RFP+DCX+/RFP+ (%)		GFP+RFP+DCX+/GFP+RFP+ (%)		RFP+DCX+/RFP+ (%)		GFP+RFP+DCX+/GFP+RFP+ (%)
	UL	DL	UL	DL	UL	DL	UL	DL
n1	60.5505	71.4286	87.931	83.871	70.6714	76.9231	94.2675	86.9565
n2	85.7143	76.506	76	79.1045	77.8481	77.7778	94.3548	100
n3	61.2903	42.1053	84.4262	83.3333	70.1613	73.75	78.9474	87.8788
Mean	69.185	63.3466	82.7858	82.1029	72.8936	76.1503	89.1899	91.6118
SD	14.3195	18.5699	6.13235	2.61061	4.29831	2.12218	8.87041	7.27904

## Sheet: Fig. 6H statistics
Expression of DCX – NBF, UL vs LL		Kruskal-Wallis test; n=3 brains/retrovirus combination, 2324 cells analysed
Hypothesis	Mean 1	Mean 2	Mean Diff.	95,00% CI of diff.	Summary	P Value
NBF RFP+ Upper vs NBF RFP+ Lower	69.185	63.3466	5.83333	-31.75272 to 43.4194	ns	0.827
NBF RFP+GFP+ Upper vs NBF RFP+GFP+ Lower	82.7858	82.103	0.68667	-9.99808 to 11.37142	ns	0.513
NBFL RFP+ Upper vs NBFL RFP+ Lower	72.8936	76.1503	-3.25667	-10.94368 to 4.43035	ns	0.513
NBFL RFP+GFP+ Upper vs NBF RFP+GFP+ Lower	89.1899	91.6118	-2.42333	-20.81286 to 15.96619	ns	0.827

## Sheet: Fig. S7 data
	Neurog2-Bcl2 + Fezf2 (NBF), 12dpi				Neurog2-Bcl2 + Fezf2-Lmo4 (NBFL), 12dpi
	Cell#	IHC profile (GFP, RFP, DCX)	Depth from cortical surfce (in µm)		Cell#	IHC profile (GFP, RFP, DCX)	Depth from cortical surfce (in µm)
	1	GFP+	142.01		1	GFP+	30.932
	2	GFP+	99.091		2	GFP+	22.726
	3	GFP+	99.091		3	GFP+	12.625
	4	GFP+	68.796		4	GFP+	71.965
	5	GFP+	20.828		5	GFP+	29.038
	6	GFP+	14.517		6	GFP+	10.101
	7	GFP+	220.904		7	GFP+	21.464
	8	GFP+	201.969		8	GFP+	9.47
	9	GFP+	308.634		9	GFP+	782.779
	10	GFP+	295.38		10	GFP+	814.974
	11	GFP+	404.569		11	GFP+	956.379
	12	GFP+	431.709		12	GFP+	54.91
	13	GFP+	514.39		13	GFP+	13.254
	14	GFP+	531.431		14	GFP+	14.517
	15	GFP+	595.809		15	GFP+	39.132
	16	GFP+	964.402		16	GFP+	21.46
	17	GFP+	921.484		17	GFP+	37.238
	18	GFP+	104.157		18	GFP+	21.459
	19	GFP+	287.853		19	GFP+	24.615
	20	GFP+	407.792		20	GFP+	663.341
	21	GFP+	484.805		21	GFP+	635.57
	22	GFP+	546.668		22	GFP+	525.75
	23	GFP+	840.834		23	GFP+	955.564
	24	GFP+	868.61		24	GFP+	918.325
	25	GFP+	824.421		25	GFP+	831.859
	26	GFP+	1172.24		26	GFP+	816.08
	27	GFP+	0		27	GFP+	706.89
	28	GFP+	82.071		28	GFP+	37.244
	29	GFP+	68.182		29	GFP+	27.144
	30	GFP+	0		30	GFP+	0
	31	GFP+	175.505		31	GFP+	16.412
	32	GFP+	181.187		32	GFP+	17.044
	33	GFP+	198.232		33	GFP+	5.681
	34	GFP+	224.748		34	GFP+	21.462
	35	GFP+	135.732		35	GFP+	15.15
	36	GFP+	224.116		36	GFP+	31.563
	37	GFP+	273.359		37	GFP+	76.382
	38	GFP+	258.839		38	GFP+	47.975
	39	GFP+	39.773		39	GFP+	61.232
	40	GFP+	342.803		40	GFP+	784.652
	41	GFP+	430.556		41	GFP+	668.501
	42	GFP+	412.879		42	GFP+	597.799
	43	GFP+	426.768		43	GFP+	0
	44	GFP+	635.732		44	GFP+	61.232
	45	GFP+	693.181		45	GFP+	73.856
	46	GFP+	696.337		46	GFP+	82.694
	47	GFP+	753.788		47	GFP+	38.506
	48	GFP+	813.13		48	GFP+	47.975
	49	GFP+	857.955		49	GFP+	33.456
	50	GFP+	719.708		50	GFP+	65.65
	51	GFP+	737.952		51	GFP+	18.937
	52	GFP+	671.895		52	GFP+	18.306
	53	GFP+	684.477		53	GFP+	3.787
	54	GFP+	369.919		54	GFP+	34.087
	55	GFP+	240.951		55	GFP+	11.993
	56	GFP+	65.428		56	GFP+	66.281
	57	GFP+	111.353		57	GFP+	94.057
	58	GFP+	119.532		58	GFP+	61.231
	59	GFP+	56.621		59	GFP+	63.757
	60	GFP+	41.522		60	GFP+	90.901
	61	GFP+	37.747		61	GFP+	103.526
	62	GFP+	3.77437		62	GFP+	111.732
	63	GFP+	736.159		63	GFP+	95.319
	64	GFP+	273.7		64	GFP+	107.313
	65	GFP+	129.614		65	GFP+	128.776
	66	GFP+	142.828		66	GFP+	194.426
	67	GFP+	128.985		67	GFP+	472.81
	68	GFP+	6.292		68	GFP+	732.887
	69	GFP+	15.101		69	GFP+	678.599
	70	GFP+	215.185		70	GFP+	720.893
	71	GFP+	61.661		71	GFP+	787.805
	72	GFP+	102.559		72	GFP+	654.611
	73	GFP+	90.604		73	GFP+	648.93
	74	GFP+	91.862		74	GFP+	11.362
	75	GFP+	66.695		75	GFP+	39.769
	76	GFP+	30.83		76	GFP+	27.775
	77	GFP+	15.108		77	GFP+	18.937
	78	GFP+	25.81		78	GFP+	18.306
	79	GFP+	37.77		79	GFP+	42.294
	80	GFP+	18.255		80	GFP+	11.994
	81	GFP+	25.18		81	GFP+	22.094
	82	GFP+	83.094		82	GFP+	28.406
	83	GFP+	88.76		83	GFP+	20.2
	84	GFP+	35.252		84	GFP+	457.659
	85	GFP+	59.146		85	GFP+	504.428
	86	GFP+	38.382		86	GFP+	580.093
	87	GFP+	183.73		87	GFP+	568.112
	88	GFP+	63.55		88	GFP+	90.798
	89	GFP+	10.067		89	GFP+	32.157
	90	GFP+	16.36		90	GFP+	49.812
	91	GFP+	112		91	GFP+	28.374
	92	GFP+	10.067		92	GFP+	25.222
	93	GFP+	30.831		93	GFP+	39.724
	94	GFP+	23.91		94	GFP+	638.102
	95	GFP+	57.888		95	GFP+	622.439
	96	GFP+	7.551		96	GFP+	657.124
	97	GFP+	45.932		97	GFP+	412.57
	98	GFP+	186.247		98	GFP+	434.65
	99	GFP+	242.876		99	GFP+	400.584
	100	GFP+	34.607		100	GFP+	312.266
	101	GFP+	26.427		101	GFP+	15.14
	102	GFP+	27.685		102	GFP+	20.818
	103	GFP+	16.359		103	GFP+	20.818
	104	GFP+	1014.35		104	GFP+	34.065
	105	GFP+	916.184		105	GFP+	56.145
	106	GFP+	512.837		106	GFP+	44.79
	107	GFP+	526.68		107	GFP+	442.85
	108	GFP+	660.081		108	GFP+	27.126
	109	GFP+	563.806		109	GFP+	55.514
	110	GFP+	968.98		110	GFP+	49.206
	111	GFP+	1057.7		111	GFP+	38.481
	112	GFP+	1111.18		112	GFP+	33.434
	113	GFP+	709.117		113	GFP+	14.509
	114	GFP+	668.218		114	GFP+	234.673
	115	GFP+	617.882		115	GFP+	33.435
	116	GFP+	437.928		116	GFP+	364.627
	117	GFP+	373.12		117	GFP+	35.958
	118	GFP+	1187.54		118	GFP+	204.393
	119	GFP+	1118.31		119	GFP+	164.019
	120	GFP+	1155.44		120	GFP+	10.093
	121	GFP+	1069.86		121	GFP+	82.009
	122	GFP+	849.591		122	GFP+	22.08
	123	GFP+	770.295		123	GFP+	26.495
	124	GFP+	466.331		124	GFP+	57.406
	125	GFP+	598.489		125	GFP+	25.864
	126	GFP+	371.932		126	GFP+	950.123
	127	GFP+	384.518		127	GFP+	1175.83
	128	GFP+	261.8		128	GFP+	1059.83
	129	GFP+	1093.39		129	GFP+	1027.67
	130	GFP+	956.244		130	GFP+	862.487
	131	GFP+	849.925		131	GFP+	736.393
	132	GFP+	652.385		132	GFP+	604.624
	133	GFP+	636.028		133	GFP+	365.675
	134	GFP+	732.282		134	GFP+	312.715
	135	GFP+	728.507		135	GFP+	5.044
	136	GFP+	825.39		136	GFP+	1133.59
	137	GFP+	461.136		137	GFP+	1160.7
	138	GFP+	596.394		138	GFP+	1079.37
	139	GFP+	959.39		139	GFP+	1055.41
	140	GFP+	707.747		140	GFP+	1044.06
	141	GFP+	770.029		141	GFP+	1076.85
	142	GFP+	927.934		142	GFP+	754.046
	143	GFP+	785.756		143	GFP+	865.64
	144	GFP+	528.451		144	GFP+	583.818
	145	GFP+	347.268		145	GFP+	627.951
	146	GFP+	332.169		146	GFP+	286.235
	147	GFP+	388.789		147	GFP+	162.032
	148	GFP+	923.012		148	GFP+	158.88
	149	GFP+	770.75		149	GFP+	110.332
	150	GFP+	575.703		150	GFP+	980.147
	151	GFP+	566.894		151	GFP+	907.17
	152	GFP+	740.549		152	GFP+	901.508
	153	GFP+	786.479		153	GFP+	937.996
	154	GFP+	580.736		154	GFP+	832.936
	155	GFP+	466.225		155	GFP+	812.175
	156	GFP+	247.269		156	GFP+	677.546
	157	GFP+	393.869		157	GFP+	675.03
	158	GFP+	359.893		158	GFP+	582.552
	159	GFP+	393.239		159	GFP+	512.721
	160	GFP+	370.589		160	GFP+	407.661
	161	GFP+	390.723		161	GFP+	438.487
	162	GFP+	393.24		162	GFP+	845.541
	163	GFP+	105.703		163	GFP+	918.519
	164	GFP+	110.737		164	GFP+	975.77
	165	GFP+	67.323		165	GFP+	971.366
	166	GFP+	565.729		166	GFP+	571.873
	167	GFP+	557.548		167	GFP+	643.593
	168	GFP+	650.053		168	GFP+	806.536
	169	GFP+	698.508		169	GFP+	668.758
	170	GFP+	25.172		170	GFP+	389.427
	171	GFP+	18.249		171	GFP+	436.611
	172	GFP+	14.474		172	GFP+	229.63
	173	GFP+	44.68		173	GFP+	222.71
	174	GFP+	39.016		174	GFP+	65.429
	175	GFP+	60.412		175	GFP+	758.92
	176	GFP+	114.531		176	GFP+	606.003
	177	GFP+	28.318		177	GFP+	244.163
	178	GFP+	129.633		178	GFP+	227.172
	179	GFP+	107.608		179	GFP+	89.358
	180	GFP+	93.764		180	GFP+	194.45
	181	GFP+	68.592		181	GFP+	191.933
	182	GFP+	11.328		182	GFP+	44.679
	183	GFP+	120.823		183	GFP+	46.568
	184	GFP+	32.723		184	GFP+	657.606
	185	GFP+	30.206		185	GFP+	708.578
	186	GFP+	27.059		186	GFP+	683.407
	187	GFP+	30.205		187	GFP+	605.375
	188	GFP+	27.06		188	GFP+	594.677
	189	GFP+	322.824		189	GFP+	529.86
	190	GFP+	505.317		190	GFP+	518.533
	191	GFP+	560.065		191	GFP+	482.664
	192	GFP+	524.825		192	GFP+	449.311
	193	GFP+	462.525		193	GFP+	379.46
	194	GFP+	281.92		194	GFP+	221.509
	195	GFP+	213.328		195	GFP+	28.947
	196	GFP+	181.235		196	GFP+	39.016
	197	GFP+	56.007		197	GFP+	26.43
	198	GFP+	30.206		198	GFP+	88.1
	199	GFP+	44.679		199	GFP+	86.212
	200	GFP+	36.499		200	GFP+	75.514
	201	GFP+	32.723		201	GFP+	10.698
	202	GFP+	25.801		202	GFP+	186.269
	203	GFP+	53.49		203	GFP+	7.552
	204	GFP+	32.093		204	GFP+DCX+	902.547
	205	GFP+	30.206		205	GFP+DCX+	871.621
	206	GFP+	12.586		206	GFP+DCX+	22.094
	207	GFP+	24.542		207	GFP+DCX+	662.187
	208	GFP+	213.328		208	GFP+DCX+	56.182
	209	GFP+	235.353		209	GFP+DCX+	140.138
	210	GFP+	47.197		210	GFP+DCX+	33.456
	211	GFP+	68.592		211	GFP+DCX+	186.22
	212	GFP+	93.763		212	GFP+DCX+	106.051
	213	GFP+	52.86		213	GFP+DCX+	0
	214	GFP+	50.972		214	GFP+DCX+	78.276
	215	GFP+	30.206		215	GFP+DCX+	641.355
	216	GFP+	44.679		216	GFP+DCX+	69.99
	217	GFP+	512.241		217	GFP+DCX+	667.106
	218	GFP+	553.144		218	GFP+DCX+	583.245
	219	GFP+	470.079		219	GFP+DCX+	117.279
	220	GFP+	514.128		220	GFP+DCX+	589.016
	221	GFP+	241.647		221	GFP+DCX+	442.85
	222	GFP+	294.507		222	GFP+DCX+	242.874
	223	GFP+	21.396		223	GFP+DCX+	20.818
	224	GFP+	74.256		224	GFP+DCX+	79.486
	225	GFP+	92.505		225	GFP+DCX+	96.519
	226	GFP+	89.359		226	GFP+DCX+	539.685
	227	GFP+	32.094		227	GFP+DCX+	602.102
	228	GFP+	88.101		228	GFP+DCX+	79.439
	229	GFP+	75.515		229	GFP+DCX+	59.895
	230	GFP+	39.645		230	GFP+DCX+	46.655
	231	GFP+	20.766		231	GFP+DCX+	907.881
	232	GFP+	188.786		232	GFP+DCX+	595.797
	233	GFP+	125.228		233	GFP+DCX+	581.927
	234	GFP+	87.471		234	GFP+DCX+	676.918
	235	GFP+	96.281		235	GFP+DCX+	410.177
	236	GFP+	29.577		236	GFP+DCX+	447.923
	237	GFP+	72.369		237	GFP+DCX+	439.745
	238	GFP+	38.387		238	GFP+DCX+	446.036
	239	GFP+DCX+	617.268		239	GFP+DCX+	469.313
	240	GFP+DCX+	268.284		240	GFP+DCX+	989.61
	241	GFP+DCX+	72.601		241	GFP+DCX+	1078.32
	242	GFP+DCX+	410.183		242	GFP+DCX+	334.064
	243	GFP+DCX+	141.551		243	GFP+DCX+	504.059
	244	GFP+DCX+	171.119		244	GFP+DCX+	42.162
	245	GFP+DCX+	28.943		245	GFP+DCX+	675.855
	246	GFP+DCX+	28.957		246	GFP+DCX+	504.06
	247	GFP+DCX+	126.471		247	GFP+DCX+	414.701
	248	GFP+DCX+	424.089		248	GFP+DCX+	2.517
	249	GFP+DCX+	1166.77		249	RFP+	13.257
	250	GFP+DCX+	1023.56		250	RFP+	135.093
	251	GFP+DCX+	968.827		251	RFP+	69.44
	252	GFP+DCX+	1014.87		252	RFP+	34.089
	253	GFP+DCX+	629.916		253	RFP+	31.564
	254	GFP+DCX+	576.427		254	RFP+	359.826
	255	GFP+DCX+	159.21		255	RFP+	849.062
	256	GFP+DCX+	37.757		256	RFP+	893.252
	257	RFP+	88.993		257	RFP+	843.381
	258	RFP+	152.739		258	RFP+	989.205
	259	RFP+	168.518		259	RFP+	26.508
	260	RFP+	259.404		260	RFP+	55.542
	261	RFP+	283.388		261	RFP+	183.034
	262	RFP+	309.266		262	RFP+	335.773
	263	RFP+	691.113		263	RFP+	44.181
	264	RFP+	768.745		264	RFP+	13.885
	265	RFP+	758.647		265	RFP+	17.041
	266	RFP+	752.335		266	RFP+	23.984
	267	RFP+	718.252		267	RFP+	164.1
	268	RFP+	821.761		268	RFP+	32.189
	269	RFP+	926.533		269	RFP+	42.287
	270	RFP+	25.25		270	RFP+	53.648
	271	RFP+	70.069		271	RFP+	73.845
	272	RFP+	194.427		272	RFP+	120.55
	273	RFP+	326.36		273	RFP+	136.329
	274	RFP+	563.081		274	RFP+	44.188
	275	RFP+	691.226		275	RFP+	25.25
	276	RFP+	784.021		276	RFP+	27.775
	277	RFP+	762.558		277	RFP+	18.306
	278	RFP+	928.579		278	RFP+	15.15
	279	RFP+	1153.31		279	RFP+	24.619
	280	RFP+	24.621		280	RFP+	111.101
	281	RFP+	124.369		281	RFP+	105.42
	282	RFP+	152.778		282	RFP+	837.676
	283	RFP+	98.485		283	RFP+	823.79
	284	RFP+	53.662		284	RFP+	792.226
	285	RFP+	188.131		285	RFP+	68.807
	286	RFP+	81.44		286	RFP+	46.713
	287	RFP+	346.591		287	RFP+	13.256
	288	RFP+	272.727		288	RFP+	35.981
	289	RFP+	845.328		289	RFP+	27.144
	290	RFP+	630.373		290	RFP+	75.119
	291	RFP+	606.467		291	RFP+	35.35
	292	RFP+	547.33		292	RFP+	120.569
	293	RFP+	644.214		293	RFP+	45.45
	294	RFP+	526.57		294	RFP+	41.663
	295	RFP+	301.346		295	RFP+	24.619
	296	RFP+	330.285		296	RFP+	56.182
	297	RFP+	307.008		297	RFP+	102.894
	298	RFP+	256.05		298	RFP+	66.281
	299	RFP+	119.532		299	RFP+	52.394
	300	RFP+	25.164		300	RFP+	112.363
	301	RFP+	20.131		301	RFP+	35.981
	302	RFP+	11.324		302	RFP+	65.019
	303	RFP+	13.84		303	RFP+	22.094
	304	RFP+	50.958		304	RFP+	139.507
	305	RFP+	50.959		305	RFP+	162.232
	306	RFP+	190.622		306	RFP+	196.951
	307	RFP+	40.263		307	RFP+	111.732
	308	RFP+	528.525		308	RFP+	59.969
	309	RFP+	505.245		309	RFP+	52.394
	310	RFP+	531.042		310	RFP+	143.295
	311	RFP+	368.08		311	RFP+	136.982
	312	RFP+	400.798		312	RFP+	124.357
	313	RFP+	11.955		313	RFP+	114.257
	314	RFP+	6.292		314	RFP+	118.676
	315	RFP+	111.367		315	RFP+	128.776
	316	RFP+	28.957		316	RFP+	103.526
	317	RFP+	24.55		317	RFP+	95.951
	318	RFP+	19.514		318	RFP+	427.359
	319	RFP+	42.806		319	RFP+	350.346
	320	RFP+	27.698		320	RFP+	777.705
	321	RFP+	20.144		321	RFP+	747.406
	322	RFP+	37.77		322	RFP+	753.087
	323	RFP+	10.696		323	RFP+	710.792
	324	RFP+	42.157		324	RFP+	652.086
	325	RFP+	57.258		325	RFP+	620.523
	326	RFP+	37.124		326	RFP+	539.723
	327	RFP+	112		327	RFP+	54.288
	328	RFP+	150.382		328	RFP+	21.463
	329	RFP+	108.854		329	RFP+	11.363
	330	RFP+	25.169		330	RFP+	74.488
	331	RFP+	40.899		331	RFP+	65.65
	332	RFP+	28.314		332	RFP+	37.244
	333	RFP+	20.135		333	RFP+	87.745
	334	RFP+	169.258		334	RFP+	106.682
	335	RFP+	88.09		335	RFP+	135.088
	336	RFP+	24.539		336	RFP+	155.288
	337	RFP+	38.382		337	RFP+	202.001
	338	RFP+	67.955		338	RFP+	196.32
	339	RFP+	15.73		339	RFP+	11.362
	340	RFP+	102.562		340	RFP+	21.462
	341	RFP+	155.416		341	RFP+	743.619
	342	RFP+	21.393		342	RFP+	595.274
	343	RFP+	21.394		343	RFP+	528.992
	344	RFP+	45.304		344	RFP+	622.417
	345	RFP+	137.797		345	RFP+	578.861
	346	RFP+	139.056		346	RFP+	519.522
	347	RFP+	223.371		347	RFP+	714.396
	348	RFP+	6.292		348	RFP+	752.229
	349	RFP+	8.809		349	RFP+	617.925
	350	RFP+	9.438		350	RFP+	658.278
	351	RFP+	42.786		351	RFP+	22.068
	352	RFP+	48.449		352	RFP+	73.142
	353	RFP+	42.786		353	RFP+	49.182
	354	RFP+	52.854		354	RFP+	85.753
	355	RFP+	28.943		355	RFP+	93.95
	356	RFP+	15.73		356	RFP+	0
	357	RFP+	123.954		357	RFP+	84.491
	358	RFP+	342.92		358	RFP+	82.6
	359	RFP+	1025.67		359	RFP+	397.868
	360	RFP+	1028.19		360	RFP+	570.097
	361	RFP+	826.202		361	RFP+	302.803
	362	RFP+	819.909		362	RFP+	362.734
	363	RFP+	760.131		363	RFP+	368.411
	364	RFP+	588.976		364	RFP+	383.551
	365	RFP+	663.227		365	RFP+	451.051
	366	RFP+	633.652		366	RFP+	384.182
	367	RFP+	1047		367	RFP+	18.294
	368	RFP+	1001.07		368	RFP+	35.958
	369	RFP+	920.531		369	RFP+	32.173
	370	RFP+	787.768		370	RFP+	24.603
	371	RFP+	879.632		371	RFP+	28.388
	372	RFP+	812.936		372	RFP+	236.566
	373	RFP+	793.431		373	RFP+	31.543
	374	RFP+	520.354		374	RFP+	249.814
	375	RFP+	607.815		375	RFP+	270
	376	RFP+	442.962		376	RFP+	297.126
	377	RFP+	437.928		377	RFP+	42.898
	378	RFP+	1200.13		378	RFP+	17.032
	379	RFP+	1173.06		379	RFP+	194.299
	380	RFP+	1116.42		380	RFP+	39.743
	381	RFP+	1104.47		381	RFP+	9.463
	382	RFP+	945.878		382	RFP+	293.972
	383	RFP+	959.094		383	RFP+	146.986
	384	RFP+	933.291		384	RFP+	63.715
	385	RFP+	745.122		385	RFP+	90.841
	386	RFP+	769.037		386	RFP+	998.039
	387	RFP+	799.874		387	RFP+	628.582
	388	RFP+	860.289		388	RFP+	271.734
	389	RFP+	1151.27		389	RFP+	1149.98
	390	RFP+	931.08		390	RFP+	1049.11
	391	RFP+	718.442		391	RFP+	960.841
	392	RFP+	661.822		392	RFP+	873.836
	393	RFP+	554.244		393	RFP+	800.702
	394	RFP+	642.319		394	RFP+	770.438
	395	RFP+	621.559		395	RFP+	660.106
	396	RFP+	608.977		396	RFP+	630.473
	397	RFP+	600.169		397	RFP+	466.551
	398	RFP+	485.672		398	RFP+	124.833
	399	RFP+	479.38		399	RFP+	929.188
	400	RFP+	1065.71		400	RFP+	778.204
	401	RFP+	851.812		401	RFP+	652.382
	402	RFP+	893.334		402	RFP+	541.031
	403	RFP+	741.719		403	RFP+	471.2
	404	RFP+	600.798		404	RFP+	489.444
	405	RFP+	1021.16		405	RFP+	457.989
	406	RFP+	998.514		406	RFP+	469.942
	407	RFP+	977.121		407	RFP+	1046.23
	408	RFP+	826.118		408	RFP+	1015.4
	409	RFP+	830.522		409	RFP+	871.964
	410	RFP+	748.728		410	RFP+	903.42
	411	RFP+	751.874		411	RFP+	810.31
	412	RFP+	759.424		412	RFP+	614.653
	413	RFP+	673.226		413	RFP+	561.807
	414	RFP+	697.764		414	RFP+	703.543
	415	RFP+	556.198		415	RFP+	939.526
	416	RFP+	568.782		416	RFP+	391.417
	417	RFP+	478.809		417	RFP+	442.389
	418	RFP+	105.703		418	RFP+	420.993
	419	RFP+	35.235		419	RFP+	343.59
	420	RFP+	35.234		420	RFP+	277.515
	421	RFP+	101.927		421	RFP+	40.904
	422	RFP+	599.71		422	RFP+	75.514
	423	RFP+	502.171		423	RFP+	105.091
	424	RFP+	410.295		424	RFP+	86.212
	425	RFP+	387.012		425	RFP+	69.851
	426	RFP+	432.32		426	RFP+	512.87
	427	RFP+	261.783		427	RFP+	440.501
	428	RFP+	37.757		428	RFP+	434.838
	429	RFP+	44.05		429	RFP+	258.637
	430	RFP+	62.3		430	RFP+	104.462
	431	RFP+	101.945		431	RFP+	94.393
	432	RFP+	169.278		432	RFP+	108.237
	433	RFP+	188.786		433	RFP+	137.185
	434	RFP+	72.368		434	RFP+	126.487
	435	RFP+	170.537		435	RFP+	144.107
	436	RFP+	106.979		436	RFP+	123.969
	437	RFP+	69.851		437	RFP+	109.496
	438	RFP+	43.421		438	RFP+	70.48
	439	RFP+	100.685		439	RFP+	6.922
	440	RFP+	32.723		440	RFP+	18.25
	441	RFP+	23.913		441	RFP+	100.686
	442	RFP+	44.051		442	RFP+	147.883
	443	RFP+	45.308		443	RFP+	2.517
	444	RFP+	20.766		444	RFP+DCX+	34.72
	445	RFP+	151.029		445	RFP+DCX+	10.731
	446	RFP+	172.425		446	RFP+DCX+	42.295
	447	RFP+	299.54		447	RFP+DCX+	65.021
	448	RFP+	264.929		448	RFP+DCX+	35.983
	449	RFP+	24.542		449	RFP+DCX+	33.458
	450	RFP+	516.644		450	RFP+DCX+	78.909
	451	RFP+	494.619		451	RFP+DCX+	30.301
	452	RFP+	463.784		452	RFP+DCX+	20.832
	453	RFP+	412.812		453	RFP+DCX+	16.413
	454	RFP+	125.228		454	RFP+DCX+	31.564
	455	RFP+	37.128		455	RFP+DCX+	39.139
	456	RFP+	39.645		456	RFP+DCX+	89.01
	457	RFP+	43.421		457	RFP+DCX+	21.464
	458	RFP+	52.231		458	RFP+DCX+	11.994
	459	RFP+	93.134		459	RFP+DCX+	11.363
	460	RFP+	86.213		460	RFP+DCX+	15.782
	461	RFP+	117.047		461	RFP+DCX+	21.463
	462	RFP+	88.1		462	RFP+DCX+	13.257
	463	RFP+	18.249		463	RFP+DCX+	398.965
	464	RFP+	39.645		464	RFP+DCX+	849.694
	465	RFP+	120.823		465	RFP+DCX+	854.744
	466	RFP+	101.944		466	RFP+DCX+	878.101
	467	RFP+	35.87		467	RFP+DCX+	908.402
	468	RFP+	29.576		468	RFP+DCX+	951.329
	469	RFP+	23.912		469	RFP+DCX+	961.429
	470	RFP+	130.262		470	RFP+DCX+	970.898
	471	RFP+	21.395		471	RFP+DCX+	990.468
	472	RFP+	11.327		472	RFP+DCX+	978.474
	473	RFP+	12.585		473	RFP+DCX+	929.234
	474	RFP+	52.231		474	RFP+DCX+	901.459
	475	RFP+	112.642		475	RFP+DCX+	905.877
	476	RFP+	84.324		476	RFP+DCX+	823.811
	477	RFP+	30.835		477	RFP+DCX+	1147.02
	478	RFP+	622.995		478	RFP+DCX+	1037.81
	479	RFP+	460.01		479	RFP+DCX+	1040.34
	480	RFP+	454.976		480	RFP+DCX+	215.854
	481	RFP+	138.443		481	RFP+DCX+	57.435
	482	RFP+	161.098		482	RFP+DCX+	96.566
	483	RFP+	104.461		483	RFP+DCX+	119.288
	484	RFP+	341.075		484	RFP+DCX+	15.778
	485	RFP+	328.489		485	RFP+DCX+	34.713
	486	RFP+	235.983		486	RFP+DCX+	0
	487	RFP+	238.501		487	RFP+DCX+	16.41
	488	RFP+	183.123		488	RFP+DCX+	27.771
	489	RFP+	158.581		489	RFP+DCX+	26.509
	490	RFP+	349.255		490	RFP+DCX+	32.189
	491	RFP+	165.502		491	RFP+DCX+	11.992
	492	RFP+	88.1		492	RFP+DCX+	42.287
	493	RFP+	25.172		493	RFP+DCX+	163.468
	494	RFP+	19.508		494	RFP+DCX+	129.386
	495	RFP+	20.137		495	RFP+DCX+	151.476
	496	RFP+	22.654		496	RFP+DCX+	42.918
	497	RFP+	14.473		497	RFP+DCX+	38.5
	498	RFP+	18.25		498	RFP+DCX+	11.361
	499	RFP+	344.85		499	RFP+DCX+	11.36
	500	RFP+DCX+	41.657		500	RFP+DCX+	18.303
	501	RFP+DCX+	92.149		501	RFP+DCX+	29.033
	502	RFP+DCX+	100.354		502	RFP+DCX+	65.639
	503	RFP+DCX+	88.993		503	RFP+DCX+	158.419
	504	RFP+DCX+	161.576		504	RFP+DCX+	39.763
	505	RFP+DCX+	335.774		505	RFP+DCX+	27.14
	506	RFP+DCX+	444.332		506	RFP+DCX+	6.943
	507	RFP+DCX+	477.783		507	RFP+DCX+	18.304
	508	RFP+DCX+	432.971		508	RFP+DCX+	24.615
	509	RFP+DCX+	571.193		509	RFP+DCX+	76.37
	510	RFP+DCX+	685.432		510	RFP+DCX+	41.656
	511	RFP+DCX+	786.417		511	RFP+DCX+	21.459
	512	RFP+DCX+	825.548		512	RFP+DCX+	43.55
	513	RFP+DCX+	662.711		513	RFP+DCX+	46.705
	514	RFP+DCX+	737.818		514	RFP+DCX+	54.279
	515	RFP+DCX+	735.293		515	RFP+DCX+	58.697
	516	RFP+DCX+	736.556		516	RFP+DCX+	56.173
	517	RFP+DCX+	738.449		517	RFP+DCX+	330.093
	518	RFP+DCX+	725.195		518	RFP+DCX+	778.842
	519	RFP+DCX+	722.67		519	RFP+DCX+	776.317
	520	RFP+DCX+	727.088		520	RFP+DCX+	823.022
	521	RFP+DCX+	698.055		521	RFP+DCX+	688.586
	522	RFP+DCX+	708.785		522	RFP+DCX+	9.467
	523	RFP+DCX+	890.557		523	RFP+DCX+	22.09
	524	RFP+DCX+	80.169		524	RFP+DCX+	21.459
	525	RFP+DCX+	111.101		525	RFP+DCX+	22.721
	526	RFP+DCX+	207.683		526	RFP+DCX+	234.788
	527	RFP+DCX+	203.265		527	RFP+DCX+	102.246
	528	RFP+DCX+	412.211		528	RFP+DCX+	72.582
	529	RFP+DCX+	410.317		529	RFP+DCX+	102.894
	530	RFP+DCX+	558.031		530	RFP+DCX+	54.919
	531	RFP+DCX+	602.219		531	RFP+DCX+	7.575
	532	RFP+DCX+	635.676		532	RFP+DCX+	96.582
	533	RFP+DCX+	687.439		533	RFP+DCX+	78.907
	534	RFP+DCX+	685.545		534	RFP+DCX+	222.202
	535	RFP+DCX+	683.02		535	RFP+DCX+	28.407
	536	RFP+DCX+	719.633		536	RFP+DCX+	40.401
	537	RFP+DCX+	786.546		537	RFP+DCX+	32.825
	538	RFP+DCX+	788.44		538	RFP+DCX+	50.501
	539	RFP+DCX+	769.502		539	RFP+DCX+	34.087
	540	RFP+DCX+	765.715		540	RFP+DCX+	42.925
	541	RFP+DCX+	835.784		541	RFP+DCX+	10.732
	542	RFP+DCX+	780.234		542	RFP+DCX+	143.296
	543	RFP+DCX+	792.859		543	RFP+DCX+	129.408
	544	RFP+DCX+	797.909		544	RFP+DCX+	48.607
	545	RFP+DCX+	809.271		545	RFP+DCX+	54.92
	546	RFP+DCX+	815.584		546	RFP+DCX+	96.583
	547	RFP+DCX+	852.197		547	RFP+DCX+	84.589
	548	RFP+DCX+	825.053		548	RFP+DCX+	34.719
	549	RFP+DCX+	910.904		549	RFP+DCX+	46.082
	550	RFP+DCX+	885.022		550	RFP+DCX+	13.257
	551	RFP+DCX+	878.709		551	RFP+DCX+	5.05
	552	RFP+DCX+	854.09		552	RFP+DCX+	12.625
	553	RFP+DCX+	450.717		553	RFP+DCX+	15.15
	554	RFP+DCX+	11.364		554	RFP+DCX+	53.025
	555	RFP+DCX+	0		555	RFP+DCX+	25.25
	556	RFP+DCX+	47.349		556	RFP+DCX+	54.288
	557	RFP+DCX+	246.843		557	RFP+DCX+	55.551
	558	RFP+DCX+	33.46		558	RFP+DCX+	38.507
	559	RFP+DCX+	18.94		559	RFP+DCX+	44.819
	560	RFP+DCX+	101.01		560	RFP+DCX+	18.937
	561	RFP+DCX+	448.233		561	RFP+DCX+	19.569
	562	RFP+DCX+	482.955		562	RFP+DCX+	35.981
	563	RFP+DCX+	329.545		563	RFP+DCX+	23.988
	564	RFP+DCX+	723.484		564	RFP+DCX+	205.789
	565	RFP+DCX+	710.227		565	RFP+DCX+	842.727
	566	RFP+DCX+	672.98		566	RFP+DCX+	843.99
	567	RFP+DCX+	891.413		567	RFP+DCX+	828.84
	568	RFP+DCX+	336.576		568	RFP+DCX+	799.802
	569	RFP+DCX+	352.304		569	RFP+DCX+	800.433
	570	RFP+DCX+	20.132		570	RFP+DCX+	786.545
	571	RFP+DCX+	56.62		571	RFP+DCX+	623.05
	572	RFP+DCX+	46.554		572	RFP+DCX+	611.056
	573	RFP+DCX+	115.757		573	RFP+DCX+	613.581
	574	RFP+DCX+	105.691		574	RFP+DCX+	728.469
	575	RFP+DCX+	88.705		575	RFP+DCX+	737.307
	576	RFP+DCX+	10.695		576	RFP+DCX+	724.682
	577	RFP+DCX+	207.608		577	RFP+DCX+	723.419
	578	RFP+DCX+	35.23		578	RFP+DCX+	697.538
	579	RFP+DCX+	28.939		579	RFP+DCX+	695.013
	580	RFP+DCX+	35.2294		580	RFP+DCX+	674.812
	581	RFP+DCX+	5.03237		581	RFP+DCX+	657.137
	582	RFP+DCX+	500.211		582	RFP+DCX+	641.356
	583	RFP+DCX+	522.233		583	RFP+DCX+	600.956
	584	RFP+DCX+	127.098		584	RFP+DCX+	58.707
	585	RFP+DCX+	94.38		585	RFP+DCX+	118.044
	586	RFP+DCX+	47.819		586	RFP+DCX+	96.582
	587	RFP+DCX+	42.785		587	RFP+DCX+	73.225
	588	RFP+DCX+	72.986		588	RFP+DCX+	40.4
	589	RFP+DCX+	62.919		589	RFP+DCX+	6.943
	590	RFP+DCX+	17.626		590	RFP+DCX+	109.207
	591	RFP+DCX+	13.849		591	RFP+DCX+	139.508
	592	RFP+DCX+	50.36		592	RFP+DCX+	137.613
	593	RFP+DCX+	62.321		593	RFP+DCX+	99.107
	594	RFP+DCX+	52.878		594	RFP+DCX+	95.95
	595	RFP+DCX+	109.533		595	RFP+DCX+	57.445
	596	RFP+DCX+	156.116		596	RFP+DCX+	73.857
	597	RFP+DCX+	161.782		597	RFP+DCX+	32.826
	598	RFP+DCX+	124.641		598	RFP+DCX+	27.775
	599	RFP+DCX+	151.709		599	RFP+DCX+	54.288
	600	RFP+DCX+	175.63		600	RFP+DCX+	65.019
	601	RFP+DCX+	117.087		601	RFP+DCX+	47.344
	602	RFP+DCX+	37.14		602	RFP+DCX+	106.682
	603	RFP+DCX+	2.518		603	RFP+DCX+	82.694
	604	RFP+DCX+	82.464		604	RFP+DCX+	12.625
	605	RFP+DCX+	39.658		605	RFP+DCX+	18.306
	606	RFP+DCX+	24.55		606	RFP+DCX+	43.557
	607	RFP+DCX+	181.925		607	RFP+DCX+	29.038
	608	RFP+DCX+	151.709		608	RFP+DCX+	20.832
	609	RFP+DCX+	13.219		609	RFP+DCX+	116.782
	610	RFP+DCX+	27.698		610	RFP+DCX+	41.662
	611	RFP+DCX+	39.659		611	RFP+DCX+	5.05
	612	RFP+DCX+	43.436		612	RFP+DCX+	18.306
	613	RFP+DCX+	43.436		613	RFP+DCX+	162.863
	614	RFP+DCX+	49.101		614	RFP+DCX+	202.002
	615	RFP+DCX+	96.314		615	RFP+DCX+	185.589
	616	RFP+DCX+	97.573		616	RFP+DCX+	43.556
	617	RFP+DCX+	42.176		617	RFP+DCX+	30.3
	618	RFP+DCX+	45.324		618	RFP+DCX+	41.031
	619	RFP+DCX+	28.957		619	RFP+DCX+	160.338
	620	RFP+DCX+	59.173		620	RFP+DCX+	96.582
	621	RFP+DCX+	71.101		621	RFP+DCX+	102.894
	622	RFP+DCX+	66.068		622	RFP+DCX+	89.638
	623	RFP+DCX+	40.899		623	RFP+DCX+	91.532
	624	RFP+DCX+	40.899		624	RFP+DCX+	169.176
	625	RFP+DCX+	11.955		625	RFP+DCX+	167.914
	626	RFP+DCX+	122.696		626	RFP+DCX+	170.439
	627	RFP+DCX+	143.46		627	RFP+DCX+	249.977
	628	RFP+DCX+	151.64		628	RFP+DCX+	270.808
	629	RFP+DCX+	167.371		629	RFP+DCX+	180.539
	630	RFP+DCX+	272.994		630	RFP+DCX+	136.982
	631	RFP+DCX+	56		631	RFP+DCX+	106.682
	632	RFP+DCX+	27.056		632	RFP+DCX+	120.57
	633	RFP+DCX+	7.55		633	RFP+DCX+	140.138
	634	RFP+DCX+	27.056		634	RFP+DCX+	137.613
	635	RFP+DCX+	20.135		635	RFP+DCX+	120.57
	636	RFP+DCX+	16.359		636	RFP+DCX+	131.932
	637	RFP+DCX+	25.168		637	RFP+DCX+	126.882
	638	RFP+DCX+	33.348		638	RFP+DCX+	177.382
	639	RFP+DCX+	92.494		639	RFP+DCX+	182.432
	640	RFP+DCX+	47.82		640	RFP+DCX+	183.064
	641	RFP+DCX+	99.415		641	RFP+DCX+	188.114
	642	RFP+DCX+	69.842		642	RFP+DCX+	167.282
	643	RFP+DCX+	45.303		643	RFP+DCX+	145.82
	644	RFP+DCX+	13.843		644	RFP+DCX+	159.707
	645	RFP+DCX+	20.135		645	RFP+DCX+	493.641
	646	RFP+DCX+	137.797		646	RFP+DCX+	755.612
	647	RFP+DCX+	59.775		647	RFP+DCX+	831.993
	648	RFP+DCX+	6.292		648	RFP+DCX+	733.517
	649	RFP+DCX+	23.281		649	RFP+DCX+	631.886
	650	RFP+DCX+	23.91		650	RFP+DCX+	626.836
	651	RFP+DCX+	86.202		651	RFP+DCX+	655.242
	652	RFP+DCX+	58.516		652	RFP+DCX+	581.386
	653	RFP+DCX+	20.764		653	RFP+DCX+	595.904
	654	RFP+DCX+	24.539		654	RFP+DCX+	577.598
	655	RFP+DCX+	15.731		655	RFP+DCX+	604.111
	656	RFP+DCX+	25.798		656	RFP+DCX+	609.161
	657	RFP+DCX+	13.843		657	RFP+DCX+	480.385
	658	RFP+DCX+	29.573		658	RFP+DCX+	617.367
	659	RFP+DCX+	33.348		659	RFP+DCX+	95.951
	660	RFP+DCX+	9.438		660	RFP+DCX+	85.219
	661	RFP+DCX+	16.989		661	RFP+DCX+	152.133
	662	RFP+DCX+	12.584		662	RFP+DCX+	129.408
	663	RFP+DCX+	15.73		663	RFP+DCX+	46.082
	664	RFP+DCX+	101.933		664	RFP+DCX+	32.194
	665	RFP+DCX+	80.539		665	RFP+DCX+	26.513
	666	RFP+DCX+	0		666	RFP+DCX+	15.781
	667	RFP+DCX+	47.191		667	RFP+DCX+	78.276
	668	RFP+DCX+	337.887		668	RFP+DCX+	67.545
	669	RFP+DCX+	236.584		669	RFP+DCX+	33.457
	670	RFP+DCX+	223.999		670	RFP+DCX+	135.089
	671	RFP+DCX+	29.573		671	RFP+DCX+	79.538
	672	RFP+DCX+	997.357		672	RFP+DCX+	68.806
	673	RFP+DCX+	1043.92		673	RFP+DCX+	51.131
	674	RFP+DCX+	1098.67		674	RFP+DCX+	172.963
	675	RFP+DCX+	1081.05		675	RFP+DCX+	147.082
	676	RFP+DCX+	1032.6		676	RFP+DCX+	122.464
	677	RFP+DCX+	1030.71		677	RFP+DCX+	59.97
	678	RFP+DCX+	1017.49		678	RFP+DCX+	25.882
	679	RFP+DCX+	989.177		679	RFP+DCX+	70.07
	680	RFP+DCX+	1006.17		680	RFP+DCX+	49.869
	681	RFP+DCX+	973.446		681	RFP+DCX+	158.445
	682	RFP+DCX+	974.075		682	RFP+DCX+	41.662
	683	RFP+DCX+	968.412		683	RFP+DCX+	265.127
	684	RFP+DCX+	852.63		684	RFP+DCX+	70.069
	685	RFP+DCX+	870.878		685	RFP+DCX+	26.512
	686	RFP+DCX+	866.474		686	RFP+DCX+	34.719
	687	RFP+DCX+	820.538		687	RFP+DCX+	49.869
	688	RFP+DCX+	734.961		688	RFP+DCX+	26.513
	689	RFP+DCX+	704.128		689	RFP+DCX+	619.892
	690	RFP+DCX+	702.24		690	RFP+DCX+	609.793
	691	RFP+DCX+	726.781		691	RFP+DCX+	578.229
	692	RFP+DCX+	809.212		692	RFP+DCX+	559.292
	693	RFP+DCX+	559.401		693	RFP+DCX+	574.442
	694	RFP+DCX+	588.347		694	RFP+DCX+	1052.99
	695	RFP+DCX+	575.762		695	RFP+DCX+	724.484
	696	RFP+DCX+	678.958		696	RFP+DCX+	660.801
	697	RFP+DCX+	639.315		697	RFP+DCX+	712.505
	698	RFP+DCX+	654.417		698	RFP+DCX+	684.761
	699	RFP+DCX+	601.561		699	RFP+DCX+	746.554
	700	RFP+DCX+	599.673		700	RFP+DCX+	669.629
	701	RFP+DCX+	558.772		701	RFP+DCX+	655.126
	702	RFP+DCX+	325.951		702	RFP+DCX+	658.279
	703	RFP+DCX+	997.923		703	RFP+DCX+	597.748
	704	RFP+DCX+	1066.51		704	RFP+DCX+	628.644
	705	RFP+DCX+	1057.07		705	RFP+DCX+	637.471
	706	RFP+DCX+	984.71		706	RFP+DCX+	625.491
	707	RFP+DCX+	963.946		707	RFP+DCX+	585.136
	708	RFP+DCX+	933.745		708	RFP+DCX+	530.911
	709	RFP+DCX+	936.262		709	RFP+DCX+	460.922
	710	RFP+DCX+	911.722		710	RFP+DCX+	39.094
	711	RFP+DCX+	932.486		711	RFP+DCX+	32.157
	712	RFP+DCX+	961.429		712	RFP+DCX+	12.611
	713	RFP+DCX+	966.463		713	RFP+DCX+	49.182
	714	RFP+DCX+	1016.8		714	RFP+DCX+	71.25
	715	RFP+DCX+	1037.56		715	RFP+DCX+	53.596
	716	RFP+DCX+	870.194		716	RFP+DCX+	32.788
	717	RFP+DCX+	829.296		717	RFP+DCX+	234.559
	718	RFP+DCX+	838.105		718	RFP+DCX+	35.31
	719	RFP+DCX+	812.307		719	RFP+DCX+	78.187
	720	RFP+DCX+	831.812		720	RFP+DCX+	0
	721	RFP+DCX+	830.554		721	RFP+DCX+	13.241
	722	RFP+DCX+	828.666		722	RFP+DCX+	184.747
	723	RFP+DCX+	811.049		723	RFP+DCX+	128.629
	724	RFP+DCX+	795.948		724	RFP+DCX+	43.507
	725	RFP+DCX+	814.194		725	RFP+DCX+	17.655
	726	RFP+DCX+	797.835		726	RFP+DCX+	22.699
	727	RFP+DCX+	780.217		727	RFP+DCX+	29.005
	728	RFP+DCX+	755.678		728	RFP+DCX+	47.29
	729	RFP+DCX+	742.465		729	RFP+DCX+	31.527
	730	RFP+DCX+	718.555		730	RFP+DCX+	215.012
	731	RFP+DCX+	714.78		731	RFP+DCX+	194.835
	732	RFP+DCX+	692.128		732	RFP+DCX+	51.704
	733	RFP+DCX+	702.196		733	RFP+DCX+	25.222
	734	RFP+DCX+	471.276		734	RFP+DCX+	25.222
	735	RFP+DCX+	492.669		735	RFP+DCX+	17.655
	736	RFP+DCX+	490.153		736	RFP+DCX+	30.897
	737	RFP+DCX+	512.175		737	RFP+DCX+	20.808
	738	RFP+DCX+	491.411		738	RFP+DCX+	5.045
	739	RFP+DCX+	499.591		739	RFP+DCX+	615.402
	740	RFP+DCX+	513.433		740	RFP+DCX+	455.246
	741	RFP+DCX+	558.107		741	RFP+DCX+	500.015
	742	RFP+DCX+	596.489		742	RFP+DCX+	510.103
	743	RFP+DCX+	583.275		743	RFP+DCX+	528.389
	744	RFP+DCX+	588.309		744	RFP+DCX+	17.024
	745	RFP+DCX+	593.343		745	RFP+DCX+	5.044
	746	RFP+DCX+	615.994		746	RFP+DCX+	671.629
	747	RFP+DCX+	622.915		747	RFP+DCX+	594.691
	748	RFP+DCX+	463.096		748	RFP+DCX+	577.034
	749	RFP+DCX+	446.108		749	RFP+DCX+	505.771
	750	RFP+DCX+	461.209		750	RFP+DCX+	517.123
	751	RFP+DCX+	1350.54		751	RFP+DCX+	450.906
	752	RFP+DCX+	1248.58		752	RFP+DCX+	354.533
	753	RFP+DCX+	1222.78		753	RFP+DCX+	304.065
	754	RFP+DCX+	1057.9		754	RFP+DCX+	426.448
	755	RFP+DCX+	1078.04		755	RFP+DCX+	11.355
	756	RFP+DCX+	1015.1		756	RFP+DCX+	54.883
	757	RFP+DCX+	984.896		757	RFP+DCX+	167.803
	758	RFP+DCX+	978.603		758	RFP+DCX+	43.528
	759	RFP+DCX+	970.421		759	RFP+DCX+	52.36
	760	RFP+DCX+	985.525		760	RFP+DCX+	39.743
	761	RFP+DCX+	973.568		761	RFP+DCX+	100.304
	762	RFP+DCX+	994.336		762	RFP+DCX+	86.425
	763	RFP+DCX+	985.525		763	RFP+DCX+	92.103
	764	RFP+DCX+	952.171		764	RFP+DCX+	87.687
	765	RFP+DCX+	932.662		765	RFP+DCX+	47.313
	766	RFP+DCX+	912.524		766	RFP+DCX+	51.729
	767	RFP+DCX+	721.837		767	RFP+DCX+	73.809
	768	RFP+DCX+	743.864		768	RFP+DCX+	49.206
	769	RFP+DCX+	658.905		769	RFP+DCX+	326.775
	770	RFP+DCX+	661.422		770	RFP+DCX+	33.434
	771	RFP+DCX+	779.106		771	RFP+DCX+	29.65
	772	RFP+DCX+	750.786		772	RFP+DCX+	23.342
	773	RFP+DCX+	764.002		773	RFP+DCX+	137.523
	774	RFP+DCX+	792.951		774	RFP+DCX+	130.584
	775	RFP+DCX+	835.745		775	RFP+DCX+	137.523
	776	RFP+DCX+	804.908		776	RFP+DCX+	125.538
	777	RFP+DCX+	888.609		777	RFP+DCX+	23.341
	778	RFP+DCX+	870.988		778	RFP+DCX+	28.388
	779	RFP+DCX+	857.143		779	RFP+DCX+	23.972
	780	RFP+DCX+	860.919		780	RFP+DCX+	71.285
	781	RFP+DCX+	631.214		781	RFP+DCX+	66.869
	782	RFP+DCX+	609.188		782	RFP+DCX+	213.224
	783	RFP+DCX+	618.628		783	RFP+DCX+	216.379
	784	RFP+DCX+	614.222		784	RFP+DCX+	41.636
	785	RFP+DCX+	592.825		785	RFP+DCX+	45.421
	786	RFP+DCX+	568.282		786	RFP+DCX+	34.066
	787	RFP+DCX+	505.349		787	RFP+DCX+	50.468
	788	RFP+DCX+	508.496		788	RFP+DCX+	449.79
	789	RFP+DCX+	509.754		789	RFP+DCX+	466.823
	790	RFP+DCX+	477.029		790	RFP+DCX+	292.711
	791	RFP+DCX+	451.227		791	RFP+DCX+	20.187
	792	RFP+DCX+	428.571		792	RFP+DCX+	28.387
	793	RFP+DCX+	411.579		793	RFP+DCX+	29.649
	794	RFP+DCX+	252.989		794	RFP+DCX+	27.126
	795	RFP+DCX+	179.358		795	RFP+DCX+	25.234
	796	RFP+DCX+	939.888		796	RFP+DCX+	132.477
	797	RFP+DCX+	1038.03		797	RFP+DCX+	104.72
	798	RFP+DCX+	1077.66		798	RFP+DCX+	65.608
	799	RFP+DCX+	978.892		799	RFP+DCX+	46.051
	800	RFP+DCX+	842.376		800	RFP+DCX+	48.575
	801	RFP+DCX+	853.7		801	RFP+DCX+	82.009
	802	RFP+DCX+	862.507		802	RFP+DCX+	22.079
	803	RFP+DCX+	868.169		803	RFP+DCX+	20.817
	804	RFP+DCX+	778.836		804	RFP+DCX+	260.538
	805	RFP+DCX+	787.014		805	RFP+DCX+	136.893
	806	RFP+DCX+	790.16		806	RFP+DCX+	162.126
	807	RFP+DCX+	828.535		807	RFP+DCX+	60.561
	808	RFP+DCX+	826.648		808	RFP+DCX+	52.991
	809	RFP+DCX+	756.817		809	RFP+DCX+	55.514
	810	RFP+DCX+	761.85		810	RFP+DCX+	32.173
	811	RFP+DCX+	742.348		811	RFP+DCX+	31.542
	812	RFP+DCX+	734.798		812	RFP+DCX+	39.743
	813	RFP+DCX+	736.686		813	RFP+DCX+	51.098
	814	RFP+DCX+	717.183		814	RFP+DCX+	40.374
	815	RFP+DCX+	705.23		815	RFP+DCX+	47.313
	816	RFP+DCX+	681.953		816	RFP+DCX+	37.219
	817	RFP+DCX+	668.742		817	RFP+DCX+	34.696
	818	RFP+DCX+	671.258		818	RFP+DCX+	37.219
	819	RFP+DCX+	673.775		819	RFP+DCX+	44.159
	820	RFP+DCX+	454.845		820	RFP+DCX+	146.355
	821	RFP+DCX+	566.826		821	RFP+DCX+	113.551
	822	RFP+DCX+	577.521		822	RFP+DCX+	141.939
	823	RFP+DCX+	600.169		823	RFP+DCX+	158.972
	824	RFP+DCX+	613.38		824	RFP+DCX+	127.43
	825	RFP+DCX+	878.864		825	RFP+DCX+	132.476
	826	RFP+DCX+	783.24		826	RFP+DCX+	48.575
	827	RFP+DCX+	775.69		827	RFP+DCX+	36.589
	828	RFP+DCX+	761.85		828	RFP+DCX+	17.663
	829	RFP+DCX+	712.779		829	RFP+DCX+	22.08
	830	RFP+DCX+	703.972		830	RFP+DCX+	56.145
	831	RFP+DCX+	734.169		831	RFP+DCX+	1094.5
	832	RFP+DCX+	673.775		832	RFP+DCX+	1080.63
	833	RFP+DCX+	622.817		833	RFP+DCX+	1068.65
	834	RFP+DCX+	548.582		834	RFP+DCX+	1060.46
	835	RFP+DCX+	543.549		835	RFP+DCX+	1036.5
	836	RFP+DCX+	507.061		836	RFP+DCX+	1062.35
	837	RFP+DCX+	477.493		837	RFP+DCX+	780.526
	838	RFP+DCX+	513.982		838	RFP+DCX+	785.57
	839	RFP+DCX+	483.155		839	RFP+DCX+	391.524
	840	RFP+DCX+	451.7		840	RFP+DCX+	682.803
	841	RFP+DCX+	794.659		841	RFP+DCX+	477.268
	842	RFP+DCX+	848.768		842	RFP+DCX+	540.946
	843	RFP+DCX+	750.615		843	RFP+DCX+	1180.25
	844	RFP+DCX+	722.303		844	RFP+DCX+	1210.51
	845	RFP+DCX+	644.913		845	RFP+DCX+	1212.4
	846	RFP+DCX+	539.839		846	RFP+DCX+	1205.46
	847	RFP+DCX+	356.747		847	RFP+DCX+	1192.86
	848	RFP+DCX+	339.759		848	RFP+DCX+	1053.52
	849	RFP+DCX+	359.893		849	RFP+DCX+	1017.58
	850	RFP+DCX+	712.865		850	RFP+DCX+	884.554
	851	RFP+DCX+	721.162		851	RFP+DCX+	825.92
	852	RFP+DCX+	557.548		852	RFP+DCX+	842.313
	853	RFP+DCX+	532.377		853	RFP+DCX+	861.226
	854	RFP+DCX+	539.299		854	RFP+DCX+	817.094
	855	RFP+DCX+	445.535		855	RFP+DCX+	795.026
	856	RFP+DCX+	558.807		856	RFP+DCX+	783.047
	857	RFP+DCX+	519.161		857	RFP+DCX+	710.544
	858	RFP+DCX+	484.551		858	RFP+DCX+	701.086
	859	RFP+DCX+	505.947		859	RFP+DCX+	667.04
	860	RFP+DCX+	42.162		860	RFP+DCX+	571.208
	861	RFP+DCX+	152.917		861	RFP+DCX+	590.753
	862	RFP+DCX+	162.986		862	RFP+DCX+	581.296
	863	RFP+DCX+	137.814		863	RFP+DCX+	598.949
	864	RFP+DCX+	73.626		864	RFP+DCX+	524.553
	865	RFP+DCX+	40.274		865	RFP+DCX+	517.619
	866	RFP+DCX+	60.412		866	RFP+DCX+	554.186
	867	RFP+DCX+	45.309		867	RFP+DCX+	443.854
	868	RFP+DCX+	146.623		868	RFP+DCX+	469.072
	869	RFP+DCX+	58.524		869	RFP+DCX+	464.028
	870	RFP+DCX+	57.265		870	RFP+DCX+	460.245
	871	RFP+DCX+	72.997		871	RFP+DCX+	448.266
	872	RFP+DCX+	77.402		872	RFP+DCX+	400.981
	873	RFP+DCX+	116.418		873	RFP+DCX+	985.808
	874	RFP+DCX+	74.886		874	RFP+DCX+	1061.3
	875	RFP+DCX+	54.119		875	RFP+DCX+	1021.67
	876	RFP+DCX+	33.981		876	RFP+DCX+	1005.31
	877	RFP+DCX+	38.386		877	RFP+DCX+	993.358
	878	RFP+DCX+	18.249		878	RFP+DCX+	858.099
	879	RFP+DCX+	178.717		879	RFP+DCX+	840.485
	880	RFP+DCX+	61.041		880	RFP+DCX+	743.603
	881	RFP+DCX+	45.938		881	RFP+DCX+	666.223
	882	RFP+DCX+	54.748		882	RFP+DCX+	654.269
	883	RFP+DCX+	79.29		883	RFP+DCX+	683.838
	884	RFP+DCX+	23.912		884	RFP+DCX+	636.655
	885	RFP+DCX+	155.434		885	RFP+DCX+	608.974
	886	RFP+DCX+	148.512		886	RFP+DCX+	563.049
	887	RFP+DCX+	169.907		887	RFP+DCX+	563.05
	888	RFP+DCX+	372.537		888	RFP+DCX+	499.51
	889	RFP+DCX+	349.883		889	RFP+DCX+	472.458
	890	RFP+DCX+	280.032		890	RFP+DCX+	381.867
	891	RFP+DCX+	25.8		891	RFP+DCX+	334.684
	892	RFP+DCX+	28.317		892	RFP+DCX+	177.408
	893	RFP+DCX+	25.171		893	RFP+DCX+	191.248
	894	RFP+DCX+	356.177		894	RFP+DCX+	185.586
	895	RFP+DCX+	58.524		895	RFP+DCX+	184.957
	896	RFP+DCX+	47.826		896	RFP+DCX+	282.469
	897	RFP+DCX+	109.496		897	RFP+DCX+	1181.49
	898	RFP+DCX+	94.393		898	RFP+DCX+	1197.85
	899	RFP+DCX+	28.318		899	RFP+DCX+	1165.14
	900	RFP+DCX+	25.801		900	RFP+DCX+	1115.43
	901	RFP+DCX+	601.598		901	RFP+DCX+	1094.67
	902	RFP+DCX+	561.952		902	RFP+DCX+	1050.01
	903	RFP+DCX+	475.74		903	RFP+DCX+	1053.78
	904	RFP+DCX+	463.784		904	RFP+DCX+	981.432
	905	RFP+DCX+	448.052		905	RFP+DCX+	951.863
	906	RFP+DCX+	453.715		906	RFP+DCX+	964.445
	907	RFP+DCX+	38.387		907	RFP+DCX+	914.116
	908	RFP+DCX+	61.67		908	RFP+DCX+	909.083
	909	RFP+DCX+	30.206		909	RFP+DCX+	756.206
	910	RFP+DCX+	74.885		910	RFP+DCX+	726.008
	911	RFP+DCX+	81.178		911	RFP+DCX+	787.033
	912	RFP+DCX+	61.67		912	RFP+DCX+	768.788
	913	RFP+DCX+	60.411		913	RFP+DCX+	593.892
	914	RFP+DCX+	49.084		914	RFP+DCX+	566.211
	915	RFP+DCX+	79.29		915	RFP+DCX+	800.244
	916	RFP+DCX+	11.957		916	RFP+DCX+	459.26
	917	RFP+DCX+	79.29		917	RFP+DCX+	476.246
	918	RFP+DCX+	54.119		918	RFP+DCX+	486.312
	919	RFP+DCX+	29.576		919	RFP+DCX+	524.059
	920	RFP+DCX+	22.025		920	RFP+DCX+	539.788
	921	RFP+DCX+	27.06		921	RFP+DCX+	480.65
	922	RFP+DCX+	11.956		922	RFP+DCX+	55.363
	923	RFP+DCX+	44.68		923	RFP+DCX+	198.173
	924	RFP+DCX+	60.412		924	RFP+DCX+	674.596
	925	RFP+DCX+	50.343		925	RFP+DCX+	711.724
	926	RFP+DCX+	43.421		926	RFP+DCX+	742.559
	927	RFP+DCX+	40.904		927	RFP+DCX+	587.125
	928	RFP+DCX+	30.206		928	RFP+DCX+	375.055
	929	RFP+DCX+	62.299		929	RFP+DCX+	392.675
	930	RFP+DCX+	73.626		930	RFP+DCX+	439.243
	931	RFP+DCX+	118.306		931	RFP+DCX+	77.402
	932	RFP+DCX+	149.141		932	RFP+DCX+	53.489
	933	RFP+DCX+	168.648		933	RFP+DCX+	35.869
	934	RFP+DCX+	192.561		934	RFP+DCX+	42.791
	935	RFP+DCX+	25.171		935	RFP+DCX+	32.723
	936	RFP+DCX+	19.508		936	RFP+DCX+	41.533
	937	RFP+DCX+	373.796		937	RFP+DCX+	44.68
	938	RFP+DCX+	44.679		938	RFP+DCX+	49.084
	939	RFP+DCX+	63.558		939	RFP+DCX+	48.455
	940	RFP+DCX+	35.87		940	RFP+DCX+	65.446
	941	RFP+DCX+	100.685		941	RFP+DCX+	83.695
	942	RFP+DCX+	143.477		942	RFP+DCX+	126.487
	943	RFP+DCX+	49.084		943	RFP+DCX+	198.855
	944	RFP+DCX+	39.645		944	RFP+DCX+	72.997
	945	RFP+DCX+	444.907		945	RFP+DCX+	13.844
	946	RFP+DCX+	408.408		946	RFP+DCX+	51.601
	947	RFP+DCX+	416.589		947	RFP+DCX+	577.686
	948	RFP+DCX+	477.63		948	RFP+DCX+	583.35
	949	RFP+DCX+	497.767		949	RFP+DCX+	457.492
	950	RFP+DCX+	98.798		950	RFP+DCX+	464.414
	951	RFP+DCX+	341.704		951	RFP+DCX+	402.115
	952	RFP+DCX+	30.835		952	RFP+DCX+	293.248
	953	RFP+DCX+	26.43		953	RFP+DCX+	70.481
	954	RFP+DCX+	16.991		954	RFP+DCX+	59.153
	955	RFP+DCX+	33.981		955	RFP+DCX+	44.68
	956	RFP+DCX+	57.265		956	RFP+DCX+	17.62
	957	RFP+DCX+	46.567		957	RFP+DCX+	35.869
	958	RFP+DCX+	41.533		958	RFP+DCX+	22.025
	959	RFP+DCX+	88.1		959	RFP+DCX+	163.615
	960	RFP+DCX+	61.041		960	RFP+DCX+	83.066
	961	RFP+DCX+	88.73		961	RFP+DCX+	166.132
	962	RFP+DCX+	83.066		962	RFP+DCX+	64.816
	963	RFP+DCX+	33.982		963	RFP+DCX+	45.938
	964	RFP+DCX+	25.172		964	RFP+DCX+	27.059
	965	RFP+DCX+	27.059		965	RFP+DCX+	9.439
	966	RFP+DCX+	26.43		966	RFP+DCX+	22.025
	967	RFP+DCX+	26.43		967	RFP+DCX+	28.947
	968	RFP+DCX+	179.347		968	RFP+DCX+	156.064
	969	RFP+DCX+	15.732		969	RFP+DCX+	34.611
	970	RFP+DCX+	26.43		970	RFP+DCX+	8.18
	971	RFP+DCX+	16.361		971	RFP+DCX+	0
	972	RFP+DCX+	15.103		972	RFP+DCX+	117.047
	973	RFP+DCX+	33.352		973	RFP+DCX+	60.411
	974	RFP+DCX+	34.611		974	RFP+DCX+	27.06
	975	RFP+DCX+	66.075		975	RFP+DCX+	19.508
	976	RFP+DCX+	148.512		976	RFP+DCX+	35.24
	977	RFP+DCX+	103.832		977	GFP+RFP+	8.838
	978	RFP+DCX+	21.395		978	GFP+RFP+	51.765
	979	RFP+DCX+	30.835		979	GFP+RFP+	94.691
	980	RFP+DCX+	192.562		980	GFP+RFP+	731.505
	981	RFP+DCX+	101.315		981	GFP+RFP+	22.722
	982	GFP+RFP+	200.707		982	GFP+RFP+	0
	983	GFP+RFP+	239.877		983	GFP+RFP+	42.294
	984	GFP+RFP+	631.257		984	GFP+RFP+	673.549
	985	GFP+RFP+	397.692		985	GFP+RFP+	136.982
	986	GFP+RFP+	391.379		986	GFP+RFP+	32.825
	987	GFP+RFP+	169.192		987	GFP+RFP+	14.518
	988	GFP+RFP+	0		988	GFP+RFP+	686.174
	989	GFP+RFP+	13.889		989	GFP+RFP+	455.877
	990	GFP+RFP+	659.091		990	GFP+RFP+	32.157
	991	GFP+RFP+	779.04		991	GFP+RFP+	368.411
	992	GFP+RFP+	658.46		992	GFP+RFP+	18.294
	993	GFP+RFP+	656.167		993	GFP+RFP+	64.977
	994	GFP+RFP+	205.091		994	GFP+RFP+	405.631
	995	GFP+RFP+	41.521		995	GFP+RFP+	56.145
	996	GFP+RFP+	5.663		996	GFP+RFP+	870.053
	997	GFP+RFP+	18.247		997	GFP+RFP+	902.838
	998	GFP+RFP+	174.916		998	GFP+RFP+	615.265
	999	GFP+RFP+	23.909		999	GFP+RFP+	11.953
	1000	GFP+RFP+	69.874		1000	GFP+RFP+	910.315
	1001	GFP+RFP+	186.876		1001	GFP+RFP+	849.292
	1002	GFP+RFP+	205.753		1002	GFP+RFP+	51.588
	1003	GFP+RFP+	201.348		1003	GFP+RFP+	928.585
	1004	GFP+RFP+	24.539		1004	GFP+RFP+	928.585
	1005	GFP+RFP+	0		1005	GFP+RFP+	705.247
	1006	GFP+RFP+	3.775		1006	GFP+RFP+	188.737
	1007	GFP+RFP+	27.056		1007	GFP+RFP+	108.209
	1008	GFP+RFP+	1016.23		1008	GFP+RFP+	482.663
	1009	GFP+RFP+	1016.86		1009	GFP+RFP+	25.171
	1010	GFP+RFP+	944.501		1010	GFP+RFP+	35.869
	1011	GFP+RFP+	1042.66		1011	GFP+RFP+	30.206
	1012	GFP+RFP+	906.745		1012	GFP+RFP+	2.517
	1013	GFP+RFP+	966.464		1013	GFP+RFP+	463.785
	1014	GFP+RFP+	994.778		1014	GFP+RFP+	108.238
	1015	GFP+RFP+	1026.24		1015	GFP+RFP+	14.474
	1016	GFP+RFP+	812.936		1016	GFP+RFP+DCX+	21.463
	1017	GFP+RFP+	649.342		1017	GFP+RFP+DCX+	23.357
	1018	GFP+RFP+	408.985		1018	GFP+RFP+DCX+	41.033
	1019	GFP+RFP+	1039.02		1019	GFP+RFP+DCX+	32.195
	1020	GFP+RFP+	561.359		1020	GFP+RFP+DCX+	20.2
	1021	GFP+RFP+	420.39		1021	GFP+RFP+DCX+	17.044
	1022	GFP+RFP+	980.78		1022	GFP+RFP+DCX+	96.584
	1023	GFP+RFP+	636.658		1023	GFP+RFP+DCX+	48.608
	1024	GFP+RFP+	875.718		1024	GFP+RFP+DCX+	17.675
	1025	GFP+RFP+	565.568		1025	GFP+RFP+DCX+	20.832
	1026	GFP+RFP+	437.859		1026	GFP+RFP+DCX+	24.619
	1027	GFP+RFP+	413.324		1027	GFP+RFP+DCX+	3.787
	1028	GFP+RFP+	405.823		1028	GFP+RFP+DCX+	15.782
	1029	GFP+RFP+	609.05		1029	GFP+RFP+DCX+	50.502
	1030	GFP+RFP+	782.075		1030	GFP+RFP+DCX+	37.245
	1031	GFP+RFP+	157.296		1031	GFP+RFP+DCX+	30.932
	1032	GFP+RFP+	159.813		1032	GFP+RFP+DCX+	39.139
	1033	GFP+RFP+	287.537		1033	GFP+RFP+DCX+	18.307
	1034	GFP+RFP+	438.541		1034	GFP+RFP+DCX+	18.938
	1035	GFP+RFP+	401.485		1035	GFP+RFP+DCX+	22.095
	1036	GFP+RFP+	6.922		1036	GFP+RFP+DCX+	139.511
	1037	GFP+RFP+	52.861		1037	GFP+RFP+DCX+	24.619
	1038	GFP+RFP+	606.632		1038	GFP+RFP+DCX+	43.558
	1039	GFP+RFP+	451.828		1039	GFP+RFP+DCX+	32.195
	1040	GFP+RFP+	447.422		1040	GFP+RFP+DCX+	23.358
	1041	GFP+RFP+	42.162		1041	GFP+RFP+DCX+	25.883
	1042	GFP+RFP+	8.181		1042	GFP+RFP+DCX+	16.413
	1043	GFP+RFP+	31.464		1043	GFP+RFP+DCX+	19.57
	1044	GFP+RFP+	103.832		1044	GFP+RFP+DCX+	6.944
	1045	GFP+RFP+	37.128		1045	GFP+RFP+DCX+	11.363
	1046	GFP+RFP+	147.253		1046	GFP+RFP+DCX+	18.307
	1047	GFP+RFP+	597.195		1047	GFP+RFP+DCX+	1.894
	1048	GFP+RFP+	543.076		1048	GFP+RFP+DCX+	9.469
	1049	GFP+RFP+	414.072		1049	GFP+RFP+DCX+	8.207
	1050	GFP+RFP+DCX+	98.46		1050	GFP+RFP+DCX+	18.307
	1051	GFP+RFP+DCX+	79.526		1051	GFP+RFP+DCX+	27.145
	1052	GFP+RFP+DCX+	115.501		1052	GFP+RFP+DCX+	35.983
	1053	GFP+RFP+DCX+	964.402		1053	GFP+RFP+DCX+	13.257
	1054	GFP+RFP+DCX+	174.199		1054	GFP+RFP+DCX+	27.145
	1055	GFP+RFP+DCX+	164.731		1055	GFP+RFP+DCX+	56.183
	1056	GFP+RFP+DCX+	212.068		1056	GFP+RFP+DCX+	927.34
	1057	GFP+RFP+DCX+	194.396		1057	GFP+RFP+DCX+	1025.19
	1058	GFP+RFP+DCX+	182.404		1058	GFP+RFP+DCX+	1109.78
	1059	GFP+RFP+DCX+	229.74		1059	GFP+RFP+DCX+	26.509
	1060	GFP+RFP+DCX+	207.65		1060	GFP+RFP+DCX+	42.918
	1061	GFP+RFP+DCX+	190.608		1061	GFP+RFP+DCX+	61.853
	1062	GFP+RFP+DCX+	303.585		1062	GFP+RFP+DCX+	59.328
	1063	GFP+RFP+DCX+	435.495		1063	GFP+RFP+DCX+	102.247
	1064	GFP+RFP+DCX+	474.627		1064	GFP+RFP+DCX+	44.812
	1065	GFP+RFP+DCX+	420.348		1065	GFP+RFP+DCX+	739.078
	1066	GFP+RFP+DCX+	448.119		1066	GFP+RFP+DCX+	663.972
	1067	GFP+RFP+DCX+	424.767		1067	GFP+RFP+DCX+	674.07
	1068	GFP+RFP+DCX+	624.21		1068	GFP+RFP+DCX+	653.242
	1069	GFP+RFP+DCX+	618.53		1069	GFP+RFP+DCX+	618.529
	1070	GFP+RFP+DCX+	648.195		1070	GFP+RFP+DCX+	66.27
	1071	GFP+RFP+DCX+	665.867		1071	GFP+RFP+DCX+	35.975
	1072	GFP+RFP+DCX+	655.137		1072	GFP+RFP+DCX+	138.853
	1073	GFP+RFP+DCX+	659.555		1073	GFP+RFP+DCX+	135.697
	1074	GFP+RFP+DCX+	56.173		1074	GFP+RFP+DCX+	23.352
	1075	GFP+RFP+DCX+	701.211		1075	GFP+RFP+DCX+	27.139
	1076	GFP+RFP+DCX+	735.293		1076	GFP+RFP+DCX+	45.443
	1077	GFP+RFP+DCX+	825.548		1077	GFP+RFP+DCX+	58.697
	1078	GFP+RFP+DCX+	841.327		1078	GFP+RFP+DCX+	29.033
	1079	GFP+RFP+DCX+	20.831		1079	GFP+RFP+DCX+	20.197
	1080	GFP+RFP+DCX+	155.92		1080	GFP+RFP+DCX+	37.238
	1081	GFP+RFP+DCX+	163.495		1081	GFP+RFP+DCX+	42.287
	1082	GFP+RFP+DCX+	333.303		1082	GFP+RFP+DCX+	57.435
	1083	GFP+RFP+DCX+	368.654		1083	GFP+RFP+DCX+	53.017
	1084	GFP+RFP+DCX+	641.988		1084	GFP+RFP+DCX+	963.138
	1085	GFP+RFP+DCX+	641.357		1085	GFP+RFP+DCX+	828.072
	1086	GFP+RFP+DCX+	577.6		1086	GFP+RFP+DCX+	770.636
	1087	GFP+RFP+DCX+	588.331		1087	GFP+RFP+DCX+	744.128
	1088	GFP+RFP+DCX+	565.606		1088	GFP+RFP+DCX+	804.087
	1089	GFP+RFP+DCX+	537.2		1089	GFP+RFP+DCX+	843.85
	1090	GFP+RFP+DCX+	600.957		1090	GFP+RFP+DCX+	917.694
	1091	GFP+RFP+DCX+	609.163		1091	GFP+RFP+DCX+	53.017
	1092	GFP+RFP+DCX+	672.289		1092	GFP+RFP+DCX+	39.131
	1093	GFP+RFP+DCX+	686.176		1093	GFP+RFP+DCX+	38.5
	1094	GFP+RFP+DCX+	655.245		1094	GFP+RFP+DCX+	0
	1095	GFP+RFP+DCX+	724.683		1095	GFP+RFP+DCX+	61.221
	1096	GFP+RFP+DCX+	848.409		1096	GFP+RFP+DCX+	69.438
	1097	GFP+RFP+DCX+	472.811		1097	GFP+RFP+DCX+	37.875
	1098	GFP+RFP+DCX+	286.59		1098	GFP+RFP+DCX+	24.619
	1099	GFP+RFP+DCX+	284.091		1099	GFP+RFP+DCX+	13.257
	1100	GFP+RFP+DCX+	0		1100	GFP+RFP+DCX+	29.669
	1101	GFP+RFP+DCX+	34.722		1101	GFP+RFP+DCX+	34.719
	1102	GFP+RFP+DCX+	29.041		1102	GFP+RFP+DCX+	46.713
	1103	GFP+RFP+DCX+	73.864		1103	GFP+RFP+DCX+	10.1
	1104	GFP+RFP+DCX+	32.828		1104	GFP+RFP+DCX+	89.638
	1105	GFP+RFP+DCX+	22.727		1105	GFP+RFP+DCX+	66.282
	1106	GFP+RFP+DCX+	511.995		1106	GFP+RFP+DCX+	43.557
	1107	GFP+RFP+DCX+	496.212		1107	GFP+RFP+DCX+	60.601
	1108	GFP+RFP+DCX+	481.061		1108	GFP+RFP+DCX+	849.671
	1109	GFP+RFP+DCX+	804.923		1109	GFP+RFP+DCX+	855.352
	1110	GFP+RFP+DCX+	797.348		1110	GFP+RFP+DCX+	152.764
	1111	GFP+RFP+DCX+	679.924		1111	GFP+RFP+DCX+	58.076
	1112	GFP+RFP+DCX+	878.156		1112	GFP+RFP+DCX+	128.145
	1113	GFP+RFP+DCX+	674.411		1113	GFP+RFP+DCX+	38.507
	1114	GFP+RFP+DCX+	667.491		1114	GFP+RFP+DCX+	183.696
	1115	GFP+RFP+DCX+	536.006		1115	GFP+RFP+DCX+	42.294
	1116	GFP+RFP+DCX+	546.701		1116	GFP+RFP+DCX+	11.363
	1117	GFP+RFP+DCX+	541.039		1117	GFP+RFP+DCX+	56.182
	1118	GFP+RFP+DCX+	550.476		1118	GFP+RFP+DCX+	37.244
	1119	GFP+RFP+DCX+	268.632		1119	GFP+RFP+DCX+	819.371
	1120	GFP+RFP+DCX+	50.33		1120	GFP+RFP+DCX+	65.019
	1121	GFP+RFP+DCX+	33.972		1121	GFP+RFP+DCX+	106.051
	1122	GFP+RFP+DCX+	35.859		1122	GFP+RFP+DCX+	164.126
	1123	GFP+RFP+DCX+	69.203		1123	GFP+RFP+DCX+	151.501
	1124	GFP+RFP+DCX+	3.145		1124	GFP+RFP+DCX+	168.545
	1125	GFP+RFP+DCX+	7.549		1125	GFP+RFP+DCX+	765.712
	1126	GFP+RFP+DCX+	33.972		1126	GFP+RFP+DCX+	53.025
	1127	GFP+RFP+DCX+	25.165		1127	GFP+RFP+DCX+	50.5
	1128	GFP+RFP+DCX+	22.648		1128	GFP+RFP+DCX+	89.007
	1129	GFP+RFP+DCX+	20.132		1129	GFP+RFP+DCX+	17.044
	1130	GFP+RFP+DCX+	13.841		1130	GFP+RFP+DCX+	26.513
	1131	GFP+RFP+DCX+	37.118		1131	GFP+RFP+DCX+	150.238
	1132	GFP+RFP+DCX+	8.179		1132	GFP+RFP+DCX+	174.226
	1133	GFP+RFP+DCX+	15.099		1133	GFP+RFP+DCX+	144.557
	1134	GFP+RFP+DCX+	0.629		1134	GFP+RFP+DCX+	211.47
	1135	GFP+RFP+DCX+	19.5024		1135	GFP+RFP+DCX+	27.144
	1136	GFP+RFP+DCX+	6.291		1136	GFP+RFP+DCX+	35.981
	1137	GFP+RFP+DCX+	22.0184		1137	GFP+RFP+DCX+	43.556
	1138	GFP+RFP+DCX+	10.066		1138	GFP+RFP+DCX+	121.832
	1139	GFP+RFP+DCX+	14.47		1139	GFP+RFP+DCX+	94.056
	1140	GFP+RFP+DCX+	23.906		1140	GFP+RFP+DCX+	82.694
	1141	GFP+RFP+DCX+	42.78		1141	GFP+RFP+DCX+	82.063
	1142	GFP+RFP+DCX+	30.827		1142	GFP+RFP+DCX+	70.069
	1143	GFP+RFP+DCX+	8.178		1143	GFP+RFP+DCX+	70.7
	1144	GFP+RFP+DCX+	28.939		1144	GFP+RFP+DCX+	25.25
	1145	GFP+RFP+DCX+	516.57		1145	GFP+RFP+DCX+	94.057
	1146	GFP+RFP+DCX+	400.798		1146	GFP+RFP+DCX+	108.576
	1147	GFP+RFP+DCX+	373.743		1147	GFP+RFP+DCX+	95.319
	1148	GFP+RFP+DCX+	375.001		1148	GFP+RFP+DCX+	84.588
	1149	GFP+RFP+DCX+	84.312		1149	GFP+RFP+DCX+	94.688
	1150	GFP+RFP+DCX+	80.537		1150	GFP+RFP+DCX+	68.807
	1151	GFP+RFP+DCX+	28.943		1151	GFP+RFP+DCX+	90.901
	1152	GFP+RFP+DCX+	52.852		1152	GFP+RFP+DCX+	136.982
	1153	GFP+RFP+DCX+	371.226		1153	GFP+RFP+DCX+	116.782
	1154	GFP+RFP+DCX+	396.393		1154	GFP+RFP+DCX+	140.138
	1155	GFP+RFP+DCX+	373.742		1155	GFP+RFP+DCX+	147.082
	1156	GFP+RFP+DCX+	517.829		1156	GFP+RFP+DCX+	157.182
	1157	GFP+RFP+DCX+	3.775		1157	GFP+RFP+DCX+	158.445
	1158	GFP+RFP+DCX+	7.55		1158	GFP+RFP+DCX+	167.914
	1159	GFP+RFP+DCX+	5.034		1159	GFP+RFP+DCX+	196.32
	1160	GFP+RFP+DCX+	22.651		1160	GFP+RFP+DCX+	188.114
	1161	GFP+RFP+DCX+	33.348		1161	GFP+RFP+DCX+	205.158
	1162	GFP+RFP+DCX+	182.467		1162	GFP+RFP+DCX+	49.869
	1163	GFP+RFP+DCX+	171.77		1163	GFP+RFP+DCX+	78.276
	1164	GFP+RFP+DCX+	151.007		1164	GFP+RFP+DCX+	160.339
	1165	GFP+RFP+DCX+	123.322		1165	GFP+RFP+DCX+	74.488
	1166	GFP+RFP+DCX+	59.144		1166	GFP+RFP+DCX+	112.363
	1167	GFP+RFP+DCX+	53.481		1167	GFP+RFP+DCX+	93.426
	1168	GFP+RFP+DCX+	31.46		1168	GFP+RFP+DCX+	102.263
	1169	GFP+RFP+DCX+	8.808		1169	GFP+RFP+DCX+	196.321
	1170	GFP+RFP+DCX+	10.067		1170	GFP+RFP+DCX+	0
	1171	GFP+RFP+DCX+	169.335		1171	GFP+RFP+DCX+	32.194
	1172	GFP+RFP+DCX+	23.921		1172	GFP+RFP+DCX+	45.45
	1173	GFP+RFP+DCX+	83.094		1173	GFP+RFP+DCX+	20.831
	1174	GFP+RFP+DCX+	59.803		1174	GFP+RFP+DCX+	13.887
	1175	GFP+RFP+DCX+	27.068		1175	GFP+RFP+DCX+	18.307
	1176	GFP+RFP+DCX+	20.773		1176	GFP+RFP+DCX+	23.357
	1177	GFP+RFP+DCX+	18.256		1177	GFP+RFP+DCX+	13.256
	1178	GFP+RFP+DCX+	10.072		1178	GFP+RFP+DCX+	40.4
	1179	GFP+RFP+DCX+	11.331		1179	GFP+RFP+DCX+	22.725
	1180	GFP+RFP+DCX+	16.997		1180	GFP+RFP+DCX+	29.037
	1181	GFP+RFP+DCX+	16.367		1181	GFP+RFP+DCX+	669.761
	1182	GFP+RFP+DCX+	48.471		1182	GFP+RFP+DCX+	448.822
	1183	GFP+RFP+DCX+	6.295		1183	GFP+RFP+DCX+	316.89
	1184	GFP+RFP+DCX+	12.59		1184	GFP+RFP+DCX+	37.202
	1185	GFP+RFP+DCX+	16.996		1185	GFP+RFP+DCX+	31.527
	1186	GFP+RFP+DCX+	27.068		1186	GFP+RFP+DCX+	669.629
	1187	GFP+RFP+DCX+	33.993		1187	GFP+RFP+DCX+	709.352
	1188	GFP+RFP+DCX+	44.065		1188	GFP+RFP+DCX+	533.433
	1189	GFP+RFP+DCX+	58.543		1189	GFP+RFP+DCX+	46.66
	1190	GFP+RFP+DCX+	45.324		1190	GFP+RFP+DCX+	27.744
	1191	GFP+RFP+DCX+	52.878		1191	GFP+RFP+DCX+	46.029
	1192	GFP+RFP+DCX+	22.033		1192	GFP+RFP+DCX+	44.137
	1193	GFP+RFP+DCX+	23.292		1193	GFP+RFP+DCX+	35.31
	1194	GFP+RFP+DCX+	11.955		1194	GFP+RFP+DCX+	28.374
	1195	GFP+RFP+DCX+	302.651		1195	GFP+RFP+DCX+	23.96
	1196	GFP+RFP+DCX+	281.258		1196	GFP+RFP+DCX+	40.985
	1197	GFP+RFP+DCX+	285.663		1197	GFP+RFP+DCX+	22.7
	1198	GFP+RFP+DCX+	293.213		1198	GFP+RFP+DCX+	35.941
	1199	GFP+RFP+DCX+	325.302		1199	GFP+RFP+DCX+	56.748
	1200	GFP+RFP+DCX+	332.853		1200	GFP+RFP+DCX+	47.921
	1201	GFP+RFP+DCX+	306.426		1201	GFP+RFP+DCX+	48.551
	1202	GFP+RFP+DCX+	145.348		1202	GFP+RFP+DCX+	36.571
	1203	GFP+RFP+DCX+	6.292		1203	GFP+RFP+DCX+	46.029
	1204	GFP+RFP+DCX+	10.067		1204	GFP+RFP+DCX+	29.635
	1205	GFP+RFP+DCX+	26.427		1205	GFP+RFP+DCX+	147.545
	1206	GFP+RFP+DCX+	69.213		1206	GFP+RFP+DCX+	14.503
	1207	GFP+RFP+DCX+	59.775		1207	GFP+RFP+DCX+	64.945
	1208	GFP+RFP+DCX+	13.843		1208	GFP+RFP+DCX+	57.379
	1209	GFP+RFP+DCX+	45.303		1209	GFP+RFP+DCX+	34.049
	1210	GFP+RFP+DCX+	30.202		1210	GFP+RFP+DCX+	16.394
	1211	GFP+RFP+DCX+	42.786		1211	GFP+RFP+DCX+	8.828
	1212	GFP+RFP+DCX+	20.135		1212	GFP+RFP+DCX+	68.097
	1213	GFP+RFP+DCX+	39.64		1213	GFP+RFP+DCX+	45.398
	1214	GFP+RFP+DCX+	25.168		1214	GFP+RFP+DCX+	54.856
	1215	GFP+RFP+DCX+	54.113		1215	GFP+RFP+DCX+	48.551
	1216	GFP+RFP+DCX+	16.989		1216	GFP+RFP+DCX+	27.113
	1217	GFP+RFP+DCX+	25.168		1217	GFP+RFP+DCX+	16.394
	1218	GFP+RFP+DCX+	17.618		1218	GFP+RFP+DCX+	0
	1219	GFP+RFP+DCX+	39.64		1219	GFP+RFP+DCX+	47.921
	1220	GFP+RFP+DCX+	19.506		1220	GFP+RFP+DCX+	32.158
	1221	GFP+RFP+DCX+	16.359		1221	GFP+RFP+DCX+	37.202
	1222	GFP+RFP+DCX+	12.584		1222	GFP+RFP+DCX+	33.418
	1223	GFP+RFP+DCX+	21.393		1223	GFP+RFP+DCX+	10.719
	1224	GFP+RFP+DCX+	35.236		1224	GFP+RFP+DCX+	19.547
	1225	GFP+RFP+DCX+	28.314		1225	GFP+RFP+DCX+	32.157
	1226	GFP+RFP+DCX+	14.472		1226	GFP+RFP+DCX+	23.33
	1227	GFP+RFP+DCX+	32.09		1227	GFP+RFP+DCX+	20.177
	1228	GFP+RFP+DCX+	19.506		1228	GFP+RFP+DCX+	22.069
	1229	GFP+RFP+DCX+	1039.52		1229	GFP+RFP+DCX+	138.087
	1230	GFP+RFP+DCX+	962.748		1230	GFP+RFP+DCX+	40.985
	1231	GFP+RFP+DCX+	953.939		1231	GFP+RFP+DCX+	17.655
	1232	GFP+RFP+DCX+	952.68		1232	GFP+RFP+DCX+	6.936
	1233	GFP+RFP+DCX+	968.412		1233	GFP+RFP+DCX+	568.743
	1234	GFP+RFP+DCX+	943.242		1234	GFP+RFP+DCX+	676.564
	1235	GFP+RFP+DCX+	893.531		1235	GFP+RFP+DCX+	760.425
	1236	GFP+RFP+DCX+	899.194		1236	GFP+RFP+DCX+	766.731
	1237	GFP+RFP+DCX+	910.521		1237	GFP+RFP+DCX+	528.474
	1238	GFP+RFP+DCX+	922.477		1238	GFP+RFP+DCX+	501.357
	1239	GFP+RFP+DCX+	917.443		1239	GFP+RFP+DCX+	502.618
	1240	GFP+RFP+DCX+	847.596		1240	GFP+RFP+DCX+	511.447
	1241	GFP+RFP+DCX+	702.869		1241	GFP+RFP+DCX+	688.025
	1242	GFP+RFP+DCX+	741.253		1242	GFP+RFP+DCX+	5.047
	1243	GFP+RFP+DCX+	636.798		1243	GFP+RFP+DCX+	17.033
	1244	GFP+RFP+DCX+	560.03		1244	GFP+RFP+DCX+	25.865
	1245	GFP+RFP+DCX+	541.153		1245	GFP+RFP+DCX+	0
	1246	GFP+RFP+DCX+	461.868		1246	GFP+RFP+DCX+	15.14
	1247	GFP+RFP+DCX+	590.864		1247	GFP+RFP+DCX+	302.803
	1248	GFP+RFP+DCX+	615.404		1248	GFP+RFP+DCX+	285.771
	1249	GFP+RFP+DCX+	1095.45		1249	GFP+RFP+DCX+	247.289
	1250	GFP+RFP+DCX+	1101.74		1250	GFP+RFP+DCX+	348.224
	1251	GFP+RFP+DCX+	957.025		1251	GFP+RFP+DCX+	224.579
	1252	GFP+RFP+DCX+	945.699		1252	GFP+RFP+DCX+	85.794
	1253	GFP+RFP+DCX+	925.564		1253	GFP+RFP+DCX+	56.145
	1254	GFP+RFP+DCX+	902.913		1254	GFP+RFP+DCX+	23.341
	1255	GFP+RFP+DCX+	1010.51		1255	GFP+RFP+DCX+	29.649
	1256	GFP+RFP+DCX+	807.273		1256	GFP+RFP+DCX+	31.542
	1257	GFP+RFP+DCX+	777.071		1257	GFP+RFP+DCX+	39.743
	1258	GFP+RFP+DCX+	761.97		1258	GFP+RFP+DCX+	44.79
	1259	GFP+RFP+DCX+	665.072		1259	GFP+RFP+DCX+	29.649
	1260	GFP+RFP+DCX+	539.231		1260	GFP+RFP+DCX+	41.005
	1261	GFP+RFP+DCX+	570.691		1261	GFP+RFP+DCX+	42.897
	1262	GFP+RFP+DCX+	522.242		1262	GFP+RFP+DCX+	34.066
	1263	GFP+RFP+DCX+	532.309		1263	GFP+RFP+DCX+	29.65
	1264	GFP+RFP+DCX+	547.41		1264	GFP+RFP+DCX+	121.752
	1265	GFP+RFP+DCX+	568.174		1265	GFP+RFP+DCX+	119.86
	1266	GFP+RFP+DCX+	1205.79		1266	GFP+RFP+DCX+	20.817
	1267	GFP+RFP+DCX+	1178.73		1267	GFP+RFP+DCX+	22.079
	1268	GFP+RFP+DCX+	1142.86		1268	GFP+RFP+DCX+	20.186
	1269	GFP+RFP+DCX+	1144.74		1269	GFP+RFP+DCX+	23.341
	1270	GFP+RFP+DCX+	1135.93		1270	GFP+RFP+DCX+	24.603
	1271	GFP+RFP+DCX+	1065.45		1271	GFP+RFP+DCX+	24.603
	1272	GFP+RFP+DCX+	1042.16		1272	GFP+RFP+DCX+	27.126
	1273	GFP+RFP+DCX+	981.12		1273	GFP+RFP+DCX+	15.771
	1274	GFP+RFP+DCX+	979.232		1274	GFP+RFP+DCX+	27.757
	1275	GFP+RFP+DCX+	963.499		1275	GFP+RFP+DCX+	10.724
	1276	GFP+RFP+DCX+	993.077		1276	GFP+RFP+DCX+	101.566
	1277	GFP+RFP+DCX+	865.324		1277	GFP+RFP+DCX+	25.234
	1278	GFP+RFP+DCX+	779.106		1278	GFP+RFP+DCX+	11.355
	1279	GFP+RFP+DCX+	826.935		1279	GFP+RFP+DCX+	23.341
	1280	GFP+RFP+DCX+	716.173		1280	GFP+RFP+DCX+	66.239
	1281	GFP+RFP+DCX+	684.078		1281	GFP+RFP+DCX+	264.323
	1282	GFP+RFP+DCX+	686.595		1282	GFP+RFP+DCX+	418.879
	1283	GFP+RFP+DCX+	699.811		1283	GFP+RFP+DCX+	36.589
	1284	GFP+RFP+DCX+	318.439		1284	GFP+RFP+DCX+	21.449
	1285	GFP+RFP+DCX+	1196.56		1285	GFP+RFP+DCX+	30.912
	1286	GFP+RFP+DCX+	402		1286	GFP+RFP+DCX+	9.462
	1287	GFP+RFP+DCX+	541.662		1287	GFP+RFP+DCX+	65.608
	1288	GFP+RFP+DCX+	1076.4		1288	GFP+RFP+DCX+	33.434
	1289	GFP+RFP+DCX+	1065.71		1289	GFP+RFP+DCX+	29.65
	1290	GFP+RFP+DCX+	1130.51		1290	GFP+RFP+DCX+	27.757
	1291	GFP+RFP+DCX+	1092.76		1291	GFP+RFP+DCX+	26.496
	1292	GFP+RFP+DCX+	1070.74		1292	GFP+RFP+DCX+	17.033
	1293	GFP+RFP+DCX+	1058.79		1293	GFP+RFP+DCX+	32.804
	1294	GFP+RFP+DCX+	829.165		1294	GFP+RFP+DCX+	35.958
	1295	GFP+RFP+DCX+	568.714		1295	GFP+RFP+DCX+	87.056
	1296	GFP+RFP+DCX+	471.202		1296	GFP+RFP+DCX+	4.416
	1297	GFP+RFP+DCX+	440.376		1297	GFP+RFP+DCX+	7.57
	1298	GFP+RFP+DCX+	388.16		1298	GFP+RFP+DCX+	135
	1299	GFP+RFP+DCX+	420.874		1299	GFP+RFP+DCX+	27.126
	1300	GFP+RFP+DCX+	441.005		1300	GFP+RFP+DCX+	64.977
	1301	GFP+RFP+DCX+	307.671		1301	GFP+RFP+DCX+	39.743
	1302	GFP+RFP+DCX+	336.613		1302	GFP+RFP+DCX+	26.496
	1303	GFP+RFP+DCX+	824.859		1303	GFP+RFP+DCX+	13.879
	1304	GFP+RFP+DCX+	978.38		1304	GFP+RFP+DCX+	128.061
	1305	GFP+RFP+DCX+	855.061		1305	GFP+RFP+DCX+	14.51
	1306	GFP+RFP+DCX+	868.902		1306	GFP+RFP+DCX+	6.309
	1307	GFP+RFP+DCX+	820.455		1307	GFP+RFP+DCX+	1146.2
	1308	GFP+RFP+DCX+	614.083		1308	GFP+RFP+DCX+	1139.89
	1309	GFP+RFP+DCX+	522.222		1309	GFP+RFP+DCX+	1133.59
	1310	GFP+RFP+DCX+	619.745		1310	GFP+RFP+DCX+	1082.52
	1311	GFP+RFP+DCX+	704.056		1311	GFP+RFP+DCX+	982.908
	1312	GFP+RFP+DCX+	766.975		1312	GFP+RFP+DCX+	979.125
	1313	GFP+RFP+DCX+	697.764		1313	GFP+RFP+DCX+	915.447
	1314	GFP+RFP+DCX+	636.734		1314	GFP+RFP+DCX+	755.307
	1315	GFP+RFP+DCX+	458.045		1315	GFP+RFP+DCX+	859.335
	1316	GFP+RFP+DCX+	446.091		1316	GFP+RFP+DCX+	846.095
	1317	GFP+RFP+DCX+	432.249		1317	GFP+RFP+DCX+	840.421
	1318	GFP+RFP+DCX+	318.996		1318	GFP+RFP+DCX+	25.219
	1319	GFP+RFP+DCX+	284.391		1319	GFP+RFP+DCX+	968.407
	1320	GFP+RFP+DCX+	342.905		1320	GFP+RFP+DCX+	1138.63
	1321	GFP+RFP+DCX+	407.082		1321	GFP+RFP+DCX+	48.546
	1322	GFP+RFP+DCX+	405.823		1322	GFP+RFP+DCX+	27.11
	1323	GFP+RFP+DCX+	116.399		1323	GFP+RFP+DCX+	956.428
	1324	GFP+RFP+DCX+	623.521		1324	GFP+RFP+DCX+	867.531
	1325	GFP+RFP+DCX+	154.78		1325	GFP+RFP+DCX+	851.139
	1326	GFP+RFP+DCX+	218.327		1326	GFP+RFP+DCX+	799.44
	1327	GFP+RFP+DCX+	312.704		1327	GFP+RFP+DCX+	571.839
	1328	GFP+RFP+DCX+	695.362		1328	GFP+RFP+DCX+	532.75
	1329	GFP+RFP+DCX+	527.972		1329	GFP+RFP+DCX+	1120.35
	1330	GFP+RFP+DCX+	566.988		1330	GFP+RFP+DCX+	1110.26
	1331	GFP+RFP+DCX+	574.539		1331	GFP+RFP+DCX+	88.266
	1332	GFP+RFP+DCX+	553.773		1332	GFP+RFP+DCX+	983.291
	1333	GFP+RFP+DCX+	25.801		1333	GFP+RFP+DCX+	995.874
	1334	GFP+RFP+DCX+	22.654		1334	GFP+RFP+DCX+	1063.82
	1335	GFP+RFP+DCX+	44.68		1335	GFP+RFP+DCX+	1092.13
	1336	GFP+RFP+DCX+	44.68		1336	GFP+RFP+DCX+	1117.92
	1337	GFP+RFP+DCX+	22.655		1337	GFP+RFP+DCX+	1054.38
	1338	GFP+RFP+DCX+	589.642		1338	GFP+RFP+DCX+	1038.02
	1339	GFP+RFP+DCX+	57.895		1339	GFP+RFP+DCX+	1024.18
	1340	GFP+RFP+DCX+	35.87		1340	GFP+RFP+DCX+	703.34
	1341	GFP+RFP+DCX+	31.464		1341	GFP+RFP+DCX+	234.027
	1342	GFP+RFP+DCX+	34.61		1342	GFP+RFP+DCX+	223.962
	1343	GFP+RFP+DCX+	14.474		1343	GFP+RFP+DCX+	208.234
	1344	GFP+RFP+DCX+	23.913		1344	GFP+RFP+DCX+	964.419
	1345	GFP+RFP+DCX+	10.698		1345	GFP+RFP+DCX+	1031.73
	1346	GFP+RFP+DCX+	80.549		1346	GFP+RFP+DCX+	971.968
	1347	GFP+RFP+DCX+	47.826		1347	GFP+RFP+DCX+	944.916
	1348	GFP+RFP+DCX+	20.137		1348	GFP+RFP+DCX+	930.447
	1349	GFP+RFP+DCX+	149.141		1349	GFP+RFP+DCX+	948.691
	1350	GFP+RFP+DCX+	119.565		1350	GFP+RFP+DCX+	886.409
	1351	GFP+RFP+DCX+	27.059		1351	GFP+RFP+DCX+	865.02
	1352	GFP+RFP+DCX+	27.059		1352	GFP+RFP+DCX+	836.71
	1353	GFP+RFP+DCX+	26.43		1353	GFP+RFP+DCX+	844.888
	1354	GFP+RFP+DCX+	95.652		1354	GFP+RFP+DCX+	746.119
	1355	GFP+RFP+DCX+	153.546		1355	GFP+RFP+DCX+	708.373
	1356	GFP+RFP+DCX+	145.365		1356	GFP+RFP+DCX+	702.711
	1357	GFP+RFP+DCX+	68.592		1357	GFP+RFP+DCX+	640.429
	1358	GFP+RFP+DCX+	15.102		1358	GFP+RFP+DCX+	564.308
	1359	GFP+RFP+DCX+	113.901		1359	GFP+RFP+DCX+	562.42
	1360	GFP+RFP+DCX+	204.518		1360	GFP+RFP+DCX+	1075.17
	1361	GFP+RFP+DCX+	208.923		1361	GFP+RFP+DCX+	1065.73
	1362	GFP+RFP+DCX+	177.458		1362	GFP+RFP+DCX+	1108.51
	1363	GFP+RFP+DCX+	622.993		1363	GFP+RFP+DCX+	1029.24
	1364	GFP+RFP+DCX+	615.442		1364	GFP+RFP+DCX+	898.387
	1365	GFP+RFP+DCX+	580.831		1365	GFP+RFP+DCX+	929.214
	1366	GFP+RFP+DCX+	9.44		1366	GFP+RFP+DCX+	883.289
	1367	GFP+RFP+DCX+	12.586		1367	GFP+RFP+DCX+	862.528
	1368	GFP+RFP+DCX+	11.327		1368	GFP+RFP+DCX+	850.574
	1369	GFP+RFP+DCX+	511.61		1369	GFP+RFP+DCX+	559.29
	1370	GFP+RFP+DCX+	527.971		1370	GFP+RFP+DCX+	638.56
	1371	GFP+RFP+DCX+	544.332		1371	GFP+RFP+DCX+	790.808
	1372	GFP+RFP+DCX+	536.781		1372	GFP+RFP+DCX+	735.445
	1373	GFP+RFP+DCX+	546.85		1373	GFP+RFP+DCX+	722.233
	1374	GFP+RFP+DCX+	497.136		1374	GFP+RFP+DCX+	700.843
	1375	GFP+RFP+DCX+	498.395		1375	GFP+RFP+DCX+	494.491
	1376	GFP+RFP+DCX+	52.231		1376	GFP+RFP+DCX+	487.57
	1377	GFP+RFP+DCX+	31.465		1377	GFP+RFP+DCX+	230.888
	1378	GFP+RFP+DCX+	32.723		1378	GFP+RFP+DCX+	162.314
	1379	GFP+RFP+DCX+	38.387		1379	GFP+RFP+DCX+	111.355
	1380	GFP+RFP+DCX+	32.723		1380	GFP+RFP+DCX+	27.682
	1381	GFP+RFP+DCX+	31.464		1381	GFP+RFP+DCX+	84.954
	1382	GFP+RFP+DCX+	22.025		1382	GFP+RFP+DCX+	98.798
	1383	GFP+RFP+DCX+	120.193		1383	GFP+RFP+DCX+	108.867
	1384	GFP+RFP+DCX+	52.86		1384	GFP+RFP+DCX+	45.308
	1385	GFP+RFP+DCX+	23.913		1385	GFP+RFP+DCX+	52.231
	1386	GFP+RFP+DCX+	52.86		1386	GFP+RFP+DCX+	22.655
	1387	GFP+RFP+DCX+	39.015		1387	GFP+RFP+DCX+	36.498
	1388	GFP+RFP+DCX+	15.103		1388	GFP+RFP+DCX+	37.757
	1389	GFP+RFP+DCX+	176.83		1389	GFP+RFP+DCX+	40.274
	1390	GFP+RFP+DCX+	132.15		1390	GFP+RFP+DCX+	127.745
	1391	GFP+RFP+DCX+	39.645		1391	GFP+RFP+DCX+	39.016
	1392	GFP+RFP+DCX+	115.159		1392	GFP+RFP+DCX+	32.094
	1393	GFP+RFP+DCX+	44.05		1393	GFP+RFP+DCX+	124.599
	1394	GFP+RFP+DCX+	15.732		1394	GFP+RFP+DCX+	17.62
	1395	GFP+RFP+DCX+	40.904		1395	GFP+RFP+DCX+	30.835
	1396	GFP+RFP+DCX+	23.283		1396	GFP+RFP+DCX+	289.473
	1397	GFP+RFP+DCX+	48.455		1397	GFP+RFP+DCX+	31.464
	1398	GFP+RFP+DCX+	25.172		1398	GFP+RFP+DCX+	609.78
	1399	GFP+RFP+DCX+	70.48		1399	GFP+RFP+DCX+	622.366
	1400	GFP+RFP+DCX+	61.041		1400	GFP+RFP+DCX+	122.711
	1401	GFP+RFP+DCX+	23.913		1401	GFP+RFP+DCX+	79.291
	1402	GFP+RFP+DCX+	121.452		1402	GFP+RFP+DCX+	30.206
	1403	GFP+RFP+DCX+	115.789		1403	GFP+RFP+DCX+	13.844
	1404	GFP+RFP+DCX+	548.739		1404	GFP+RFP+DCX+	7.551
	1405	GFP+RFP+DCX+	422.252		1405	GFP+RFP+DCX+	161.097
	1406	GFP+RFP+DCX+	197.597		1406	GFP+RFP+DCX+	28.947
	1407	GFP+RFP+DCX+	13.844		1407	GFP+RFP+DCX+	111.384
	1408	GFP+RFP+DCX+	21.396		1408	GFP+RFP+DCX+	142.219
	1409	GFP+RFP+DCX+	27.688		1409	GFP+RFP+DCX+	52.86
	1410	GFP+RFP+DCX+	10.069
	1411	GFP+RFP+DCX+	40.275
	1412	GFP+RFP+DCX+	35.24
	1413	GFP+RFP+DCX+	15.103
	1414	GFP+RFP+DCX+	159.839
	1415	GFP+RFP+DCX+	57.895
	1416	GFP+RFP+DCX+	69.221
	1417	GFP+RFP+DCX+	37.128
	1418	GFP+RFP+DCX+	9.44
